# Supplementary material for: Paradoxical dominant negative activity of an immunodeficiency-associated activating PIK3R1 variant
Source: eLife journal article supplement (doi:10.7554/elife.94420), 2024-02-20

Figure 1A and Figure 1-figure supplement 2B,C – Images shown

pAkt (S473/4)

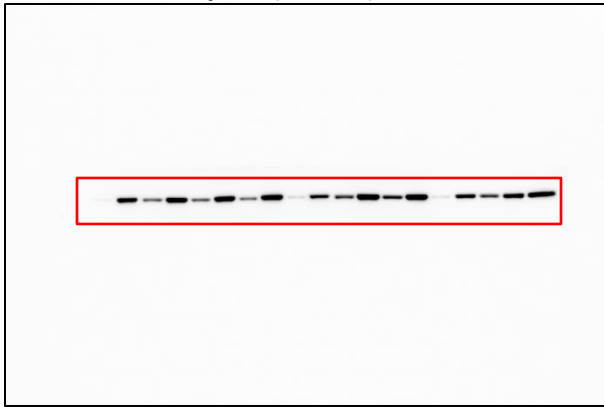

p110 $\alpha$

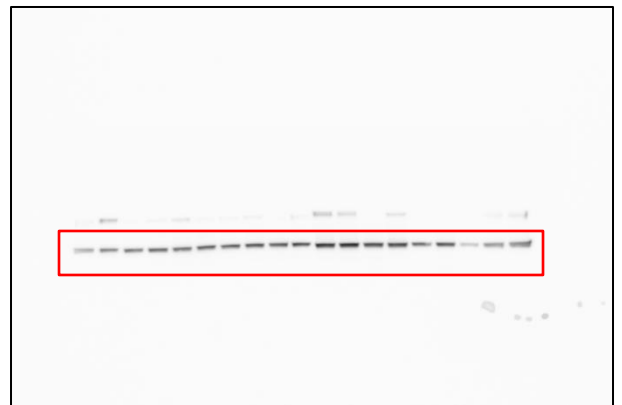

pAkt (T308/9)

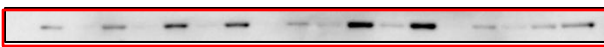

p110 $\delta$

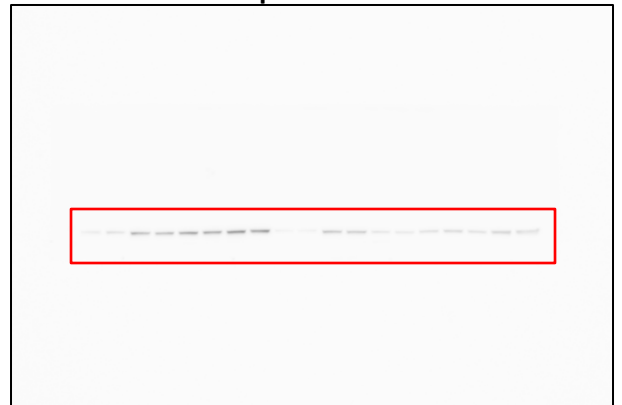

Akt

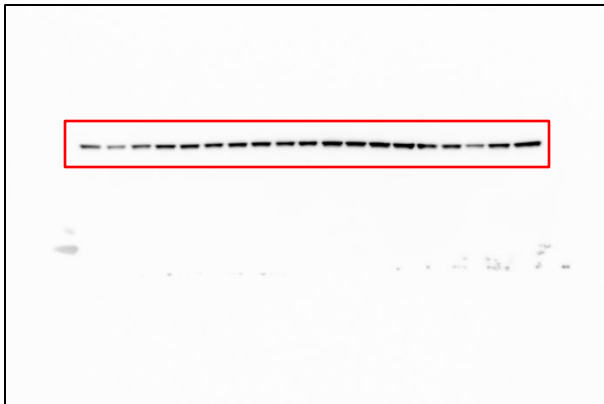

p85 $\alpha$

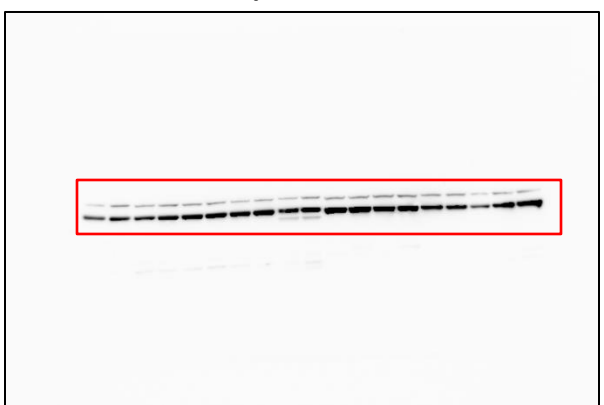

$\beta$ -actin

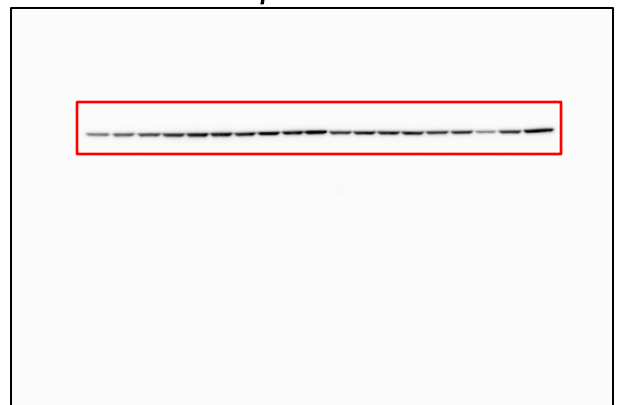

Figure 1A and Figure 1-figure supplement 2B,C – Replicate 1

pAkt (S473/4)

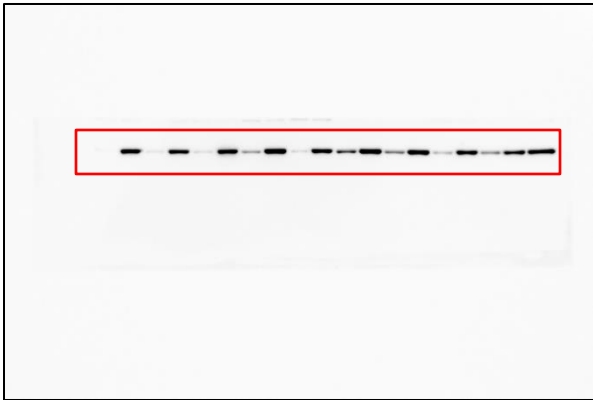

pAkt (T308/9)

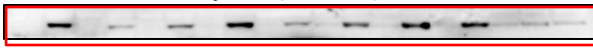

Akt

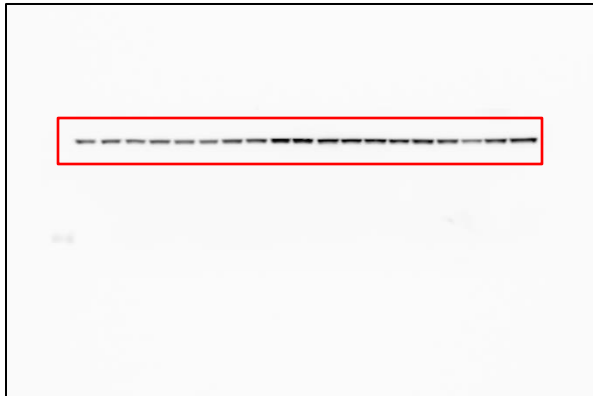

p85 $\alpha$

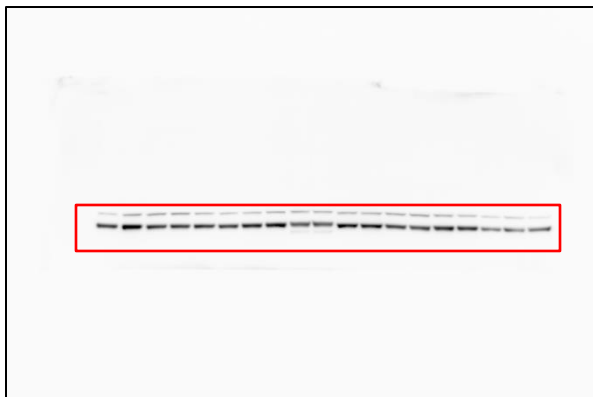

p110 $\alpha$

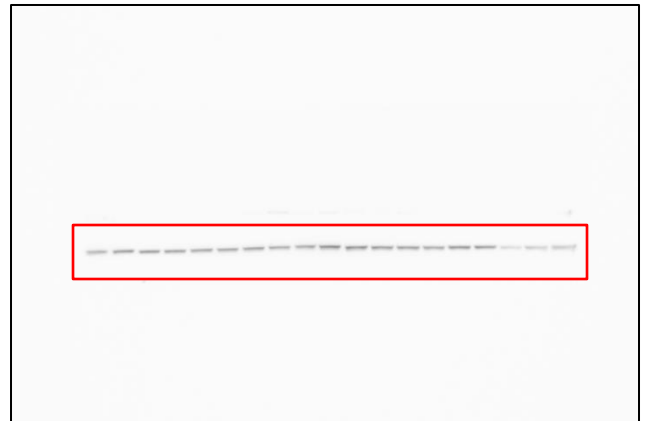

p110 $\delta$

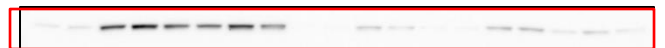

$\beta$ -actin

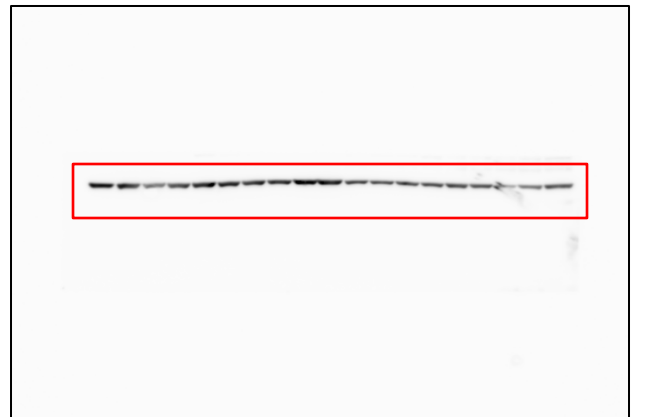

Figure 1A and Figure 1-figure supplement 2B,C – Replicate 2

pAkt (S473/4)

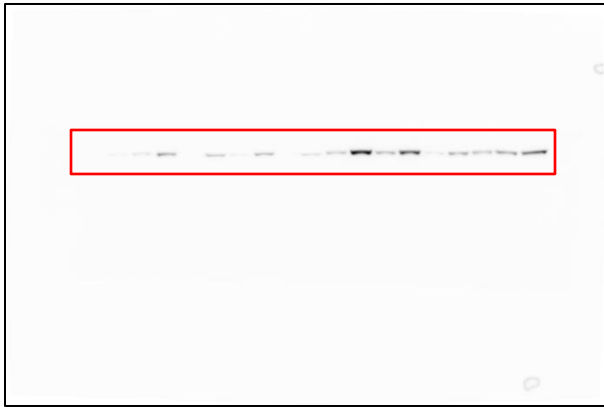

pAkt (T308/9)

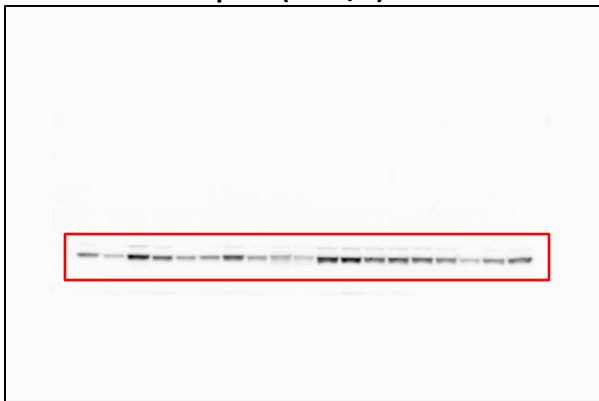

Akt

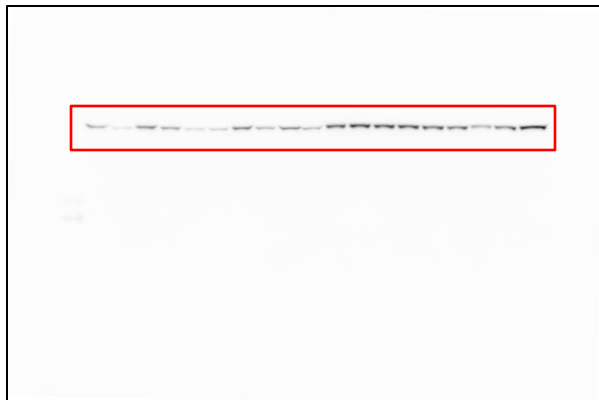

p85 $\alpha$

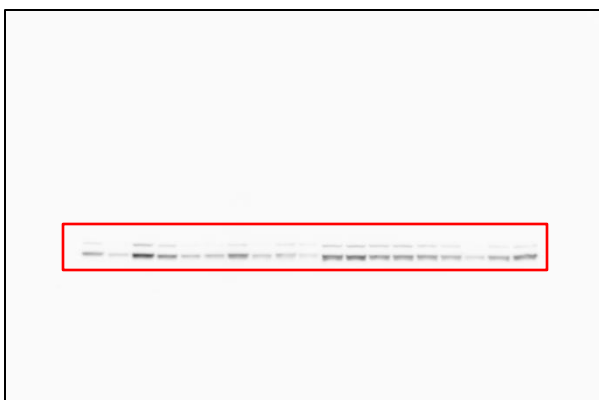

p110 $\alpha$

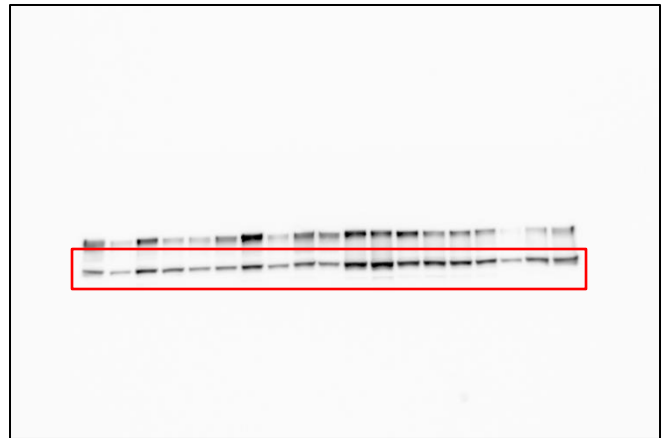

p110 $\delta$

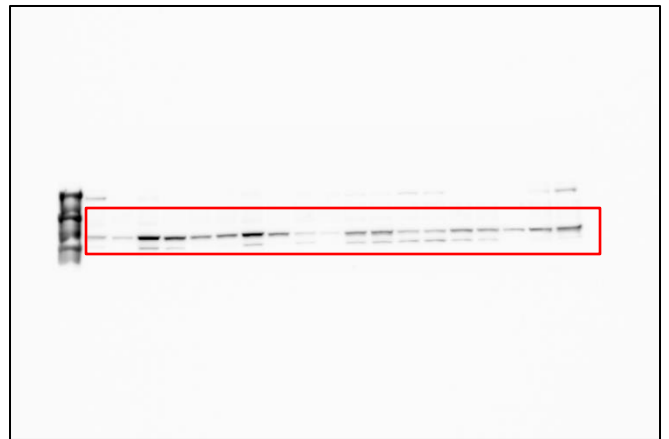

$\beta$ -actin

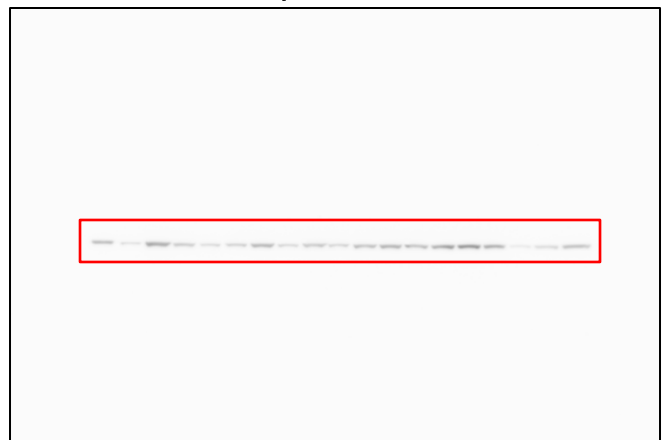

Supplement: fig1-data2 [file elife-94420-fig1-data2-v1.pdf]
