# Supplementary material for: Paradoxical dominant negative activity of an immunodeficiency-associated activating PIK3R1 variant
Source: eLife journal article supplement (doi:10.7554/elife.94420), 2024-02-20

Figure 5A – Images Shown

IP: IRS1  
Total p85 $\alpha$

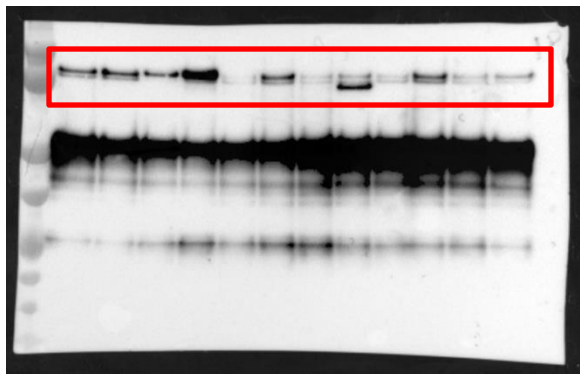

p110 $\alpha$

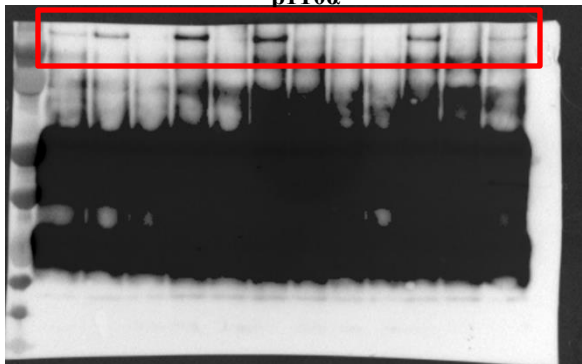

IRS1

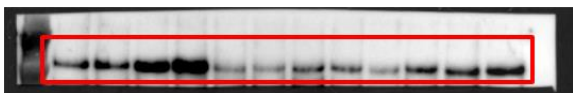

Supernatant  
Total p85 $\alpha$

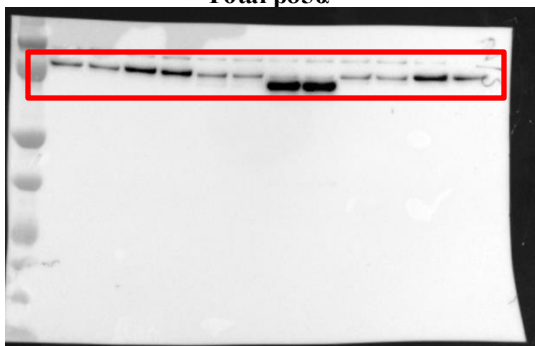

p110 $\alpha$

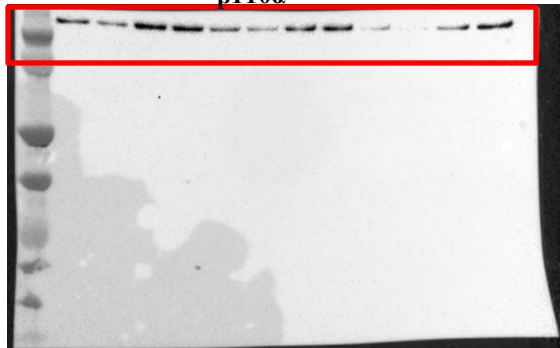

IRS1

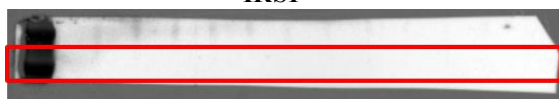

Total cell lysates

Total p85 $\alpha$

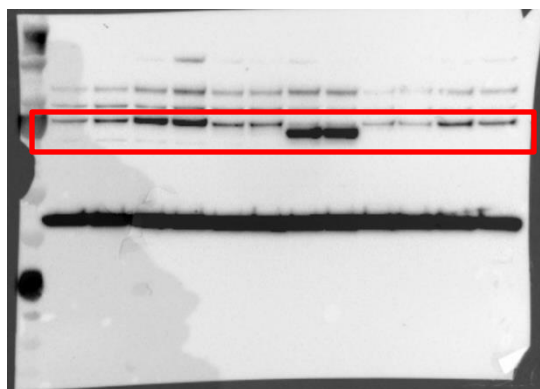

IRS1

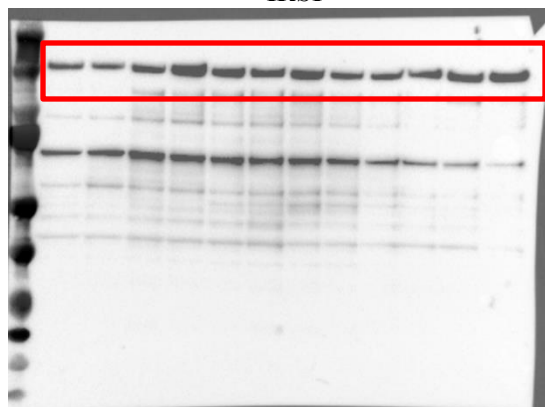

p110 $\alpha$

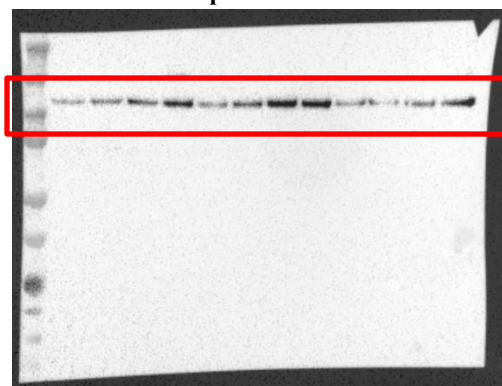

$\beta$ -actin

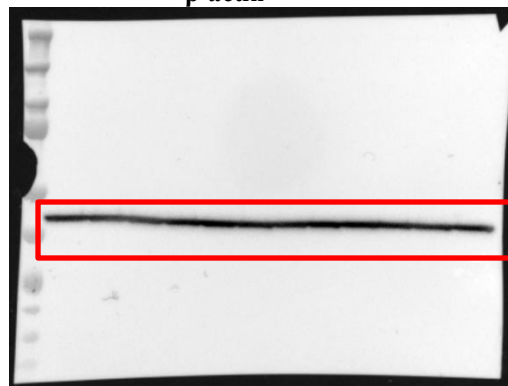

Figure 5A – Images Shown ctd

IP: IRS1

Total p85 $\alpha$

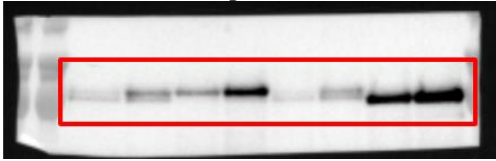

p110 $\alpha$

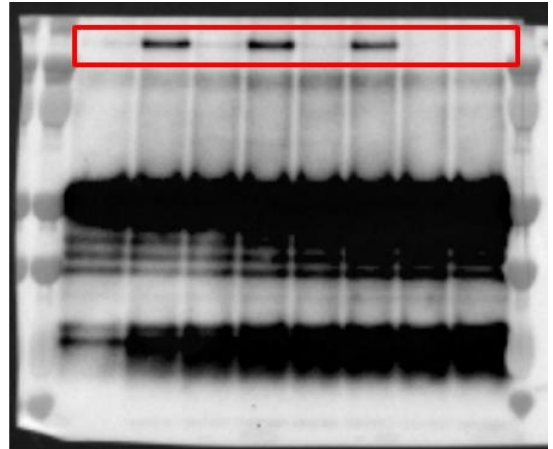

IRS1

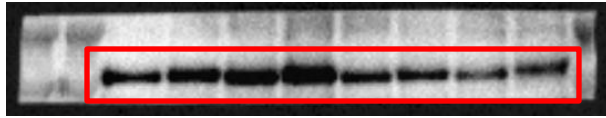

Total p85 $\alpha$

Total cell lysates

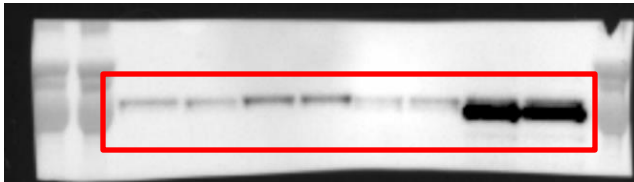

p110 $\alpha$

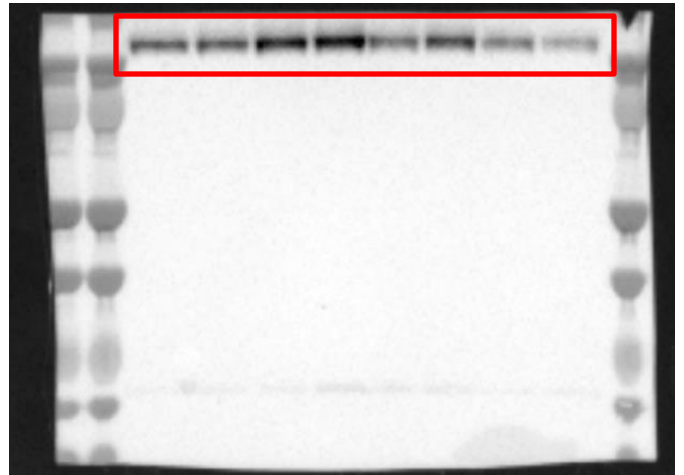

IRS1

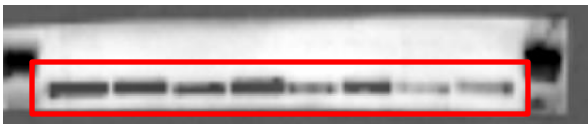

$\beta$ -actin

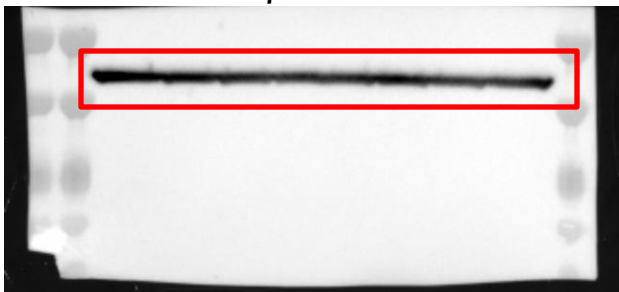

Supernatants

Total p85 $\alpha$

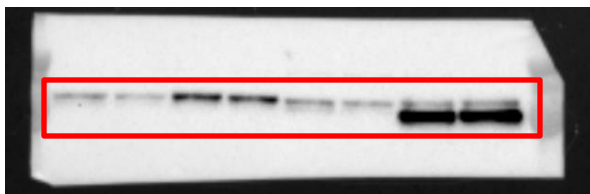

IRS1

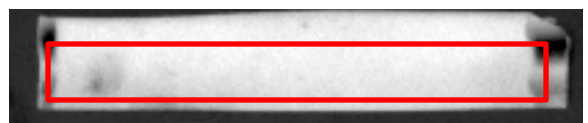

p110 $\alpha$

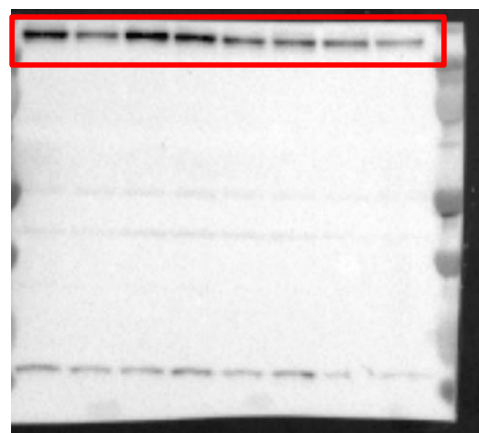

$\beta$ -actin

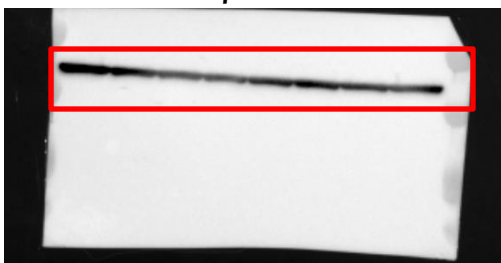

Figure 5A – Replicate 1

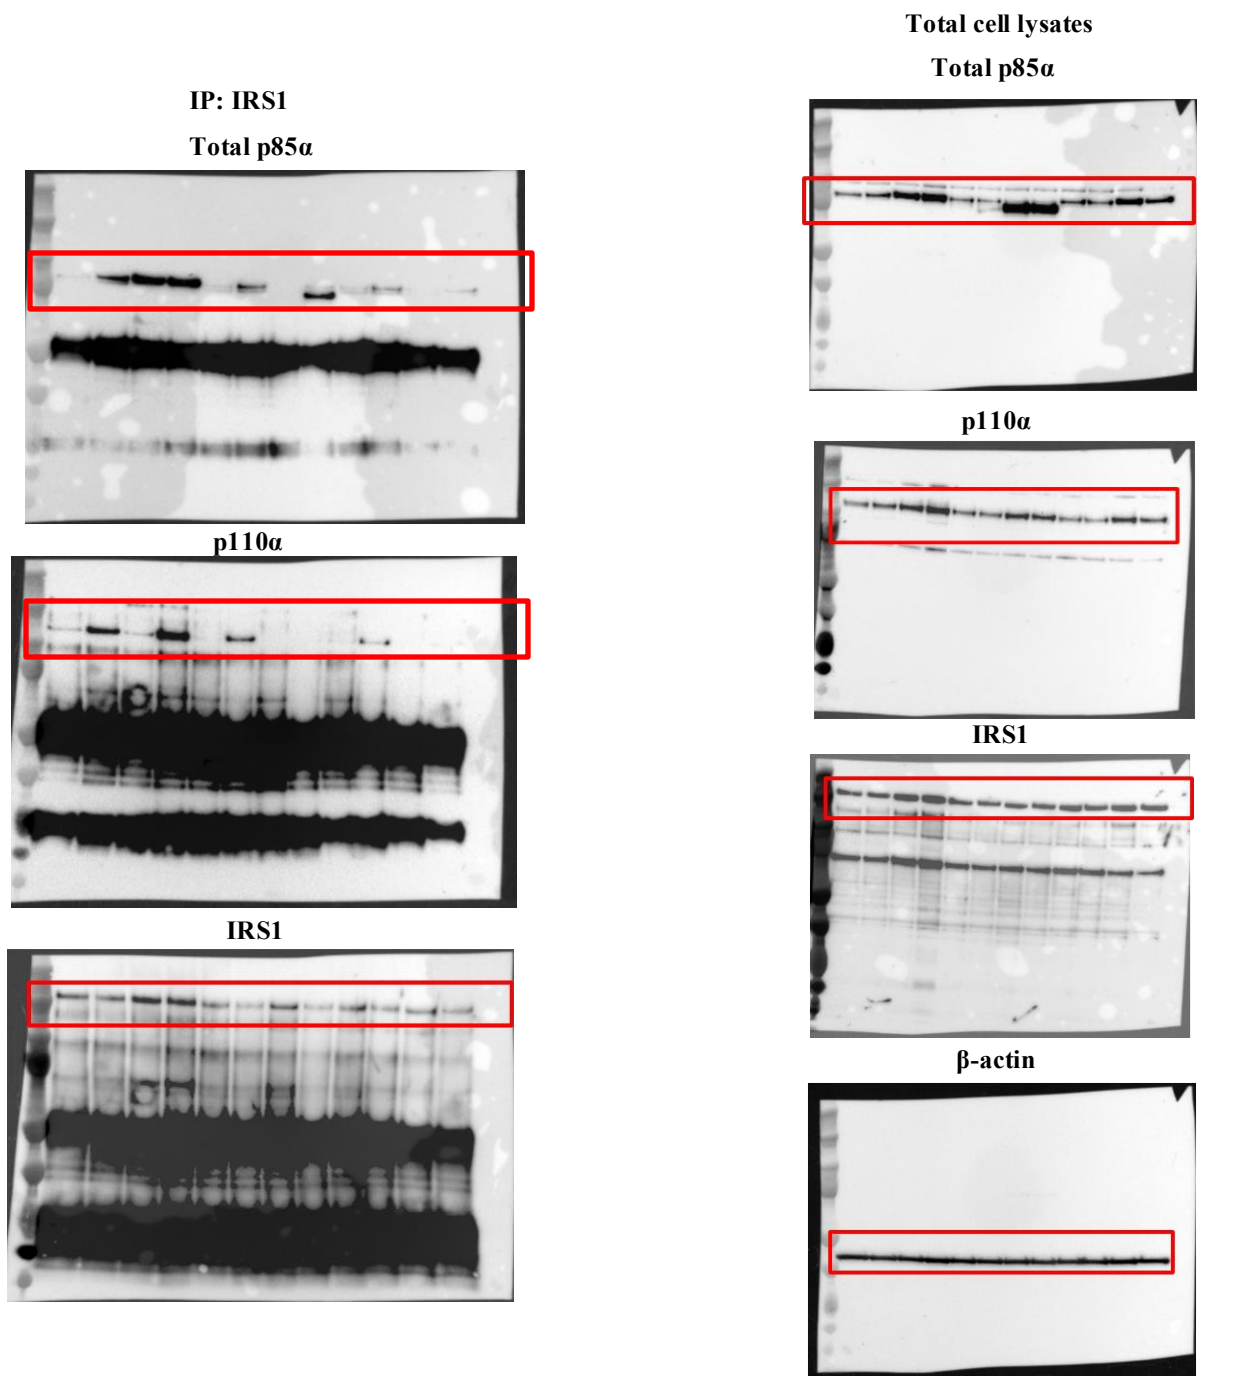

**Supernatant**

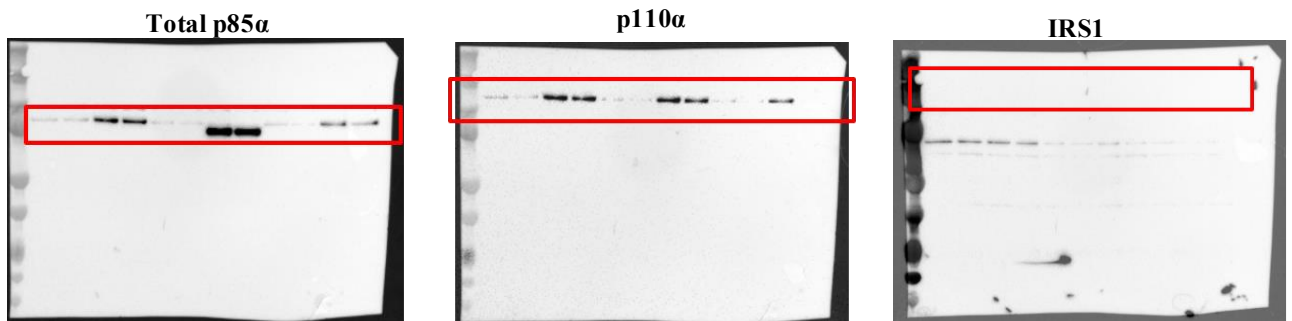

### Figure 5A Replicate 1 ctd

(Note that p85a WT + DOX +/- insulin samples are transposed compared to other replicates)

IP: IRS1

Total p85 $\alpha$

p110 $\alpha$

IRS1

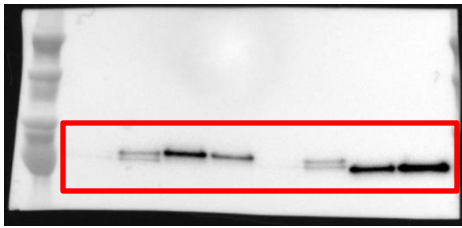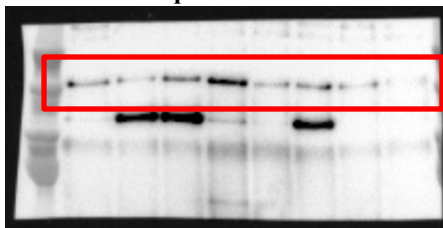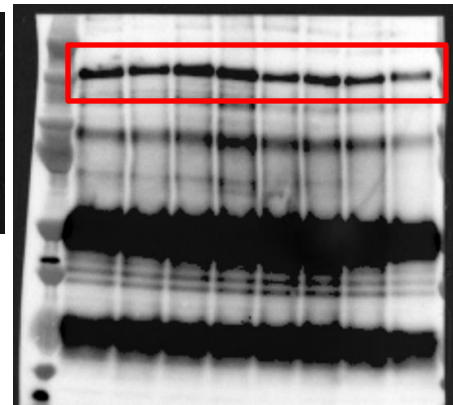

Total cell lysates

Total p85 $\alpha$

IRS1

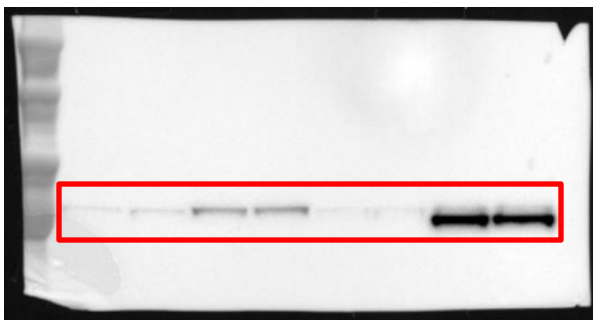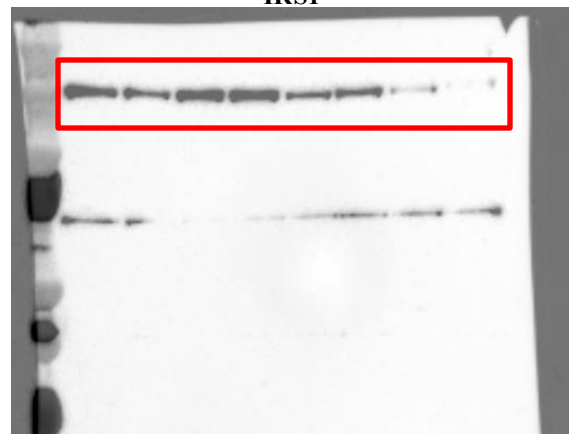

p110 $\alpha$

B-actin

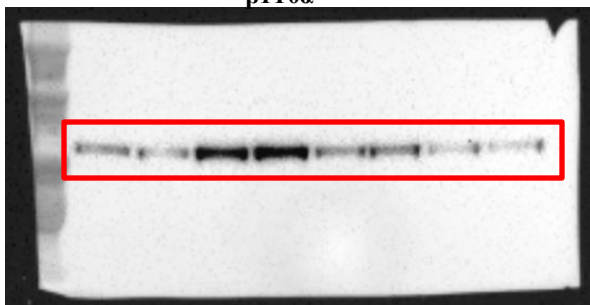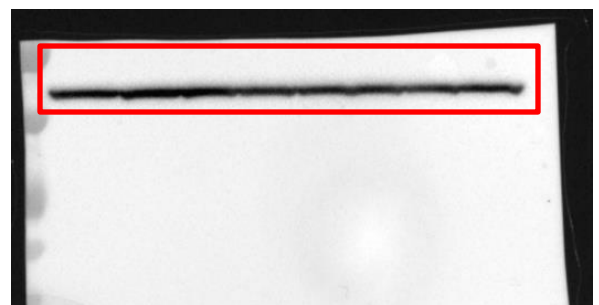

Supernatants

Total p85 $\alpha$

p110 $\alpha$

IRS1

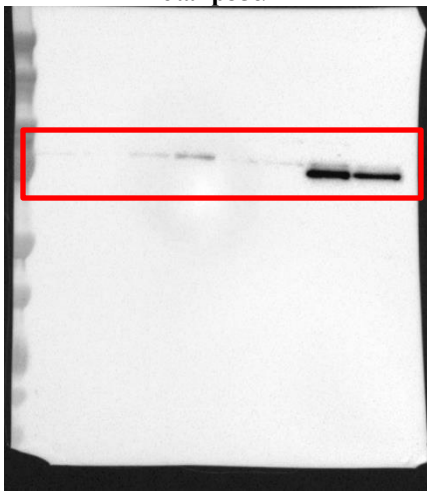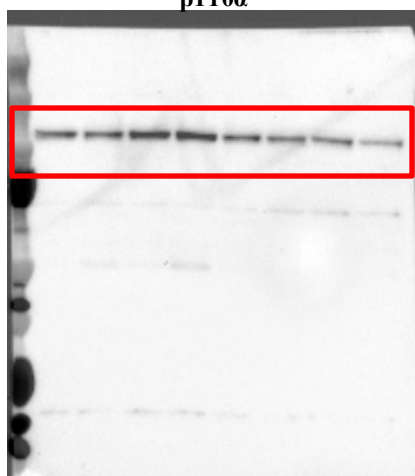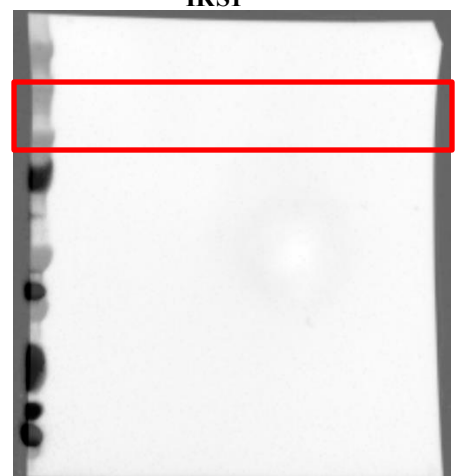

Figure 5A – Replicate 2

IP: IRS1

Total p85 $\alpha$

p110 $\alpha$

IRS1

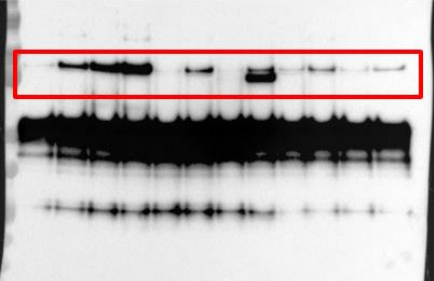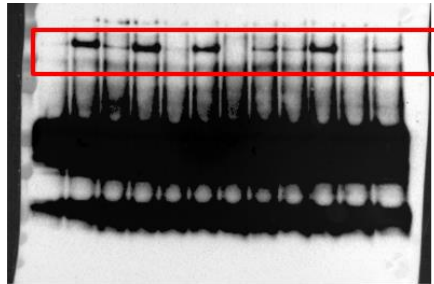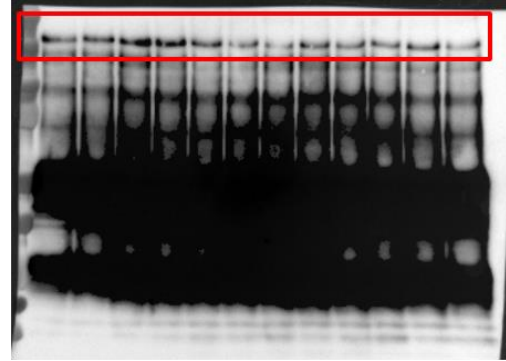

Total cell lysates

Total p85 $\alpha$

p110 $\alpha$

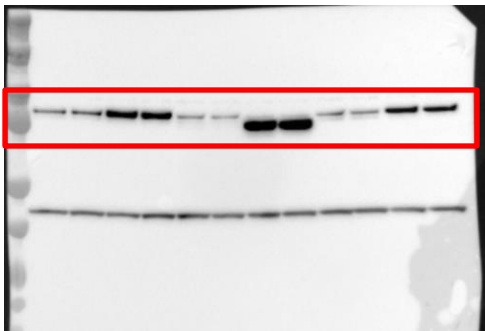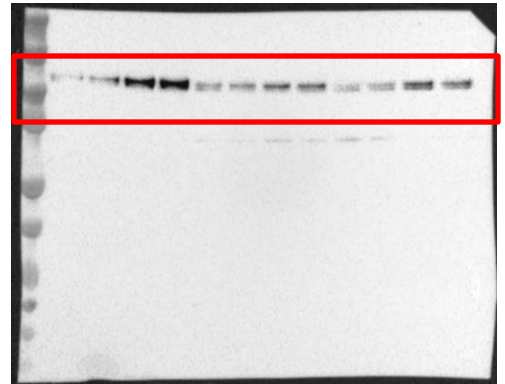

IRS1

$\beta$ -actin

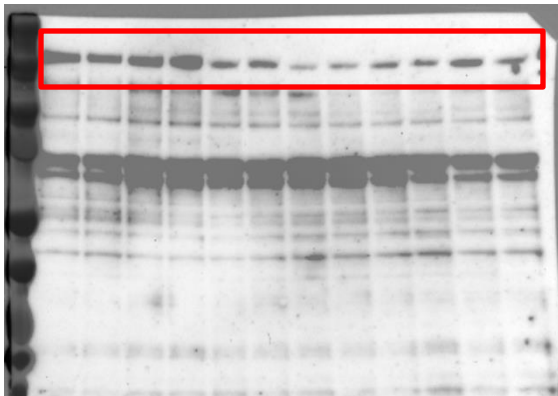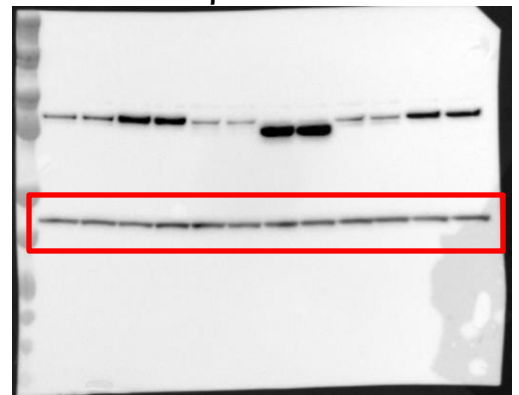

Supernatant

Total p85 $\alpha$

p110 $\alpha$

IRS1

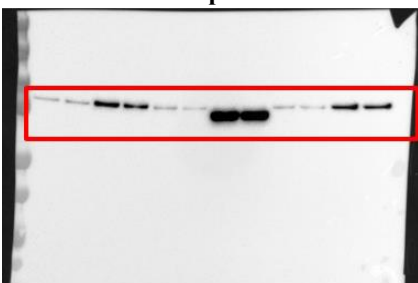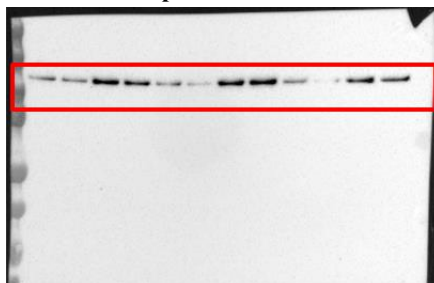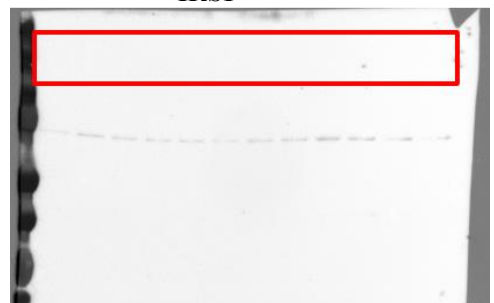

Figure 5A – Replicate 2 ctd

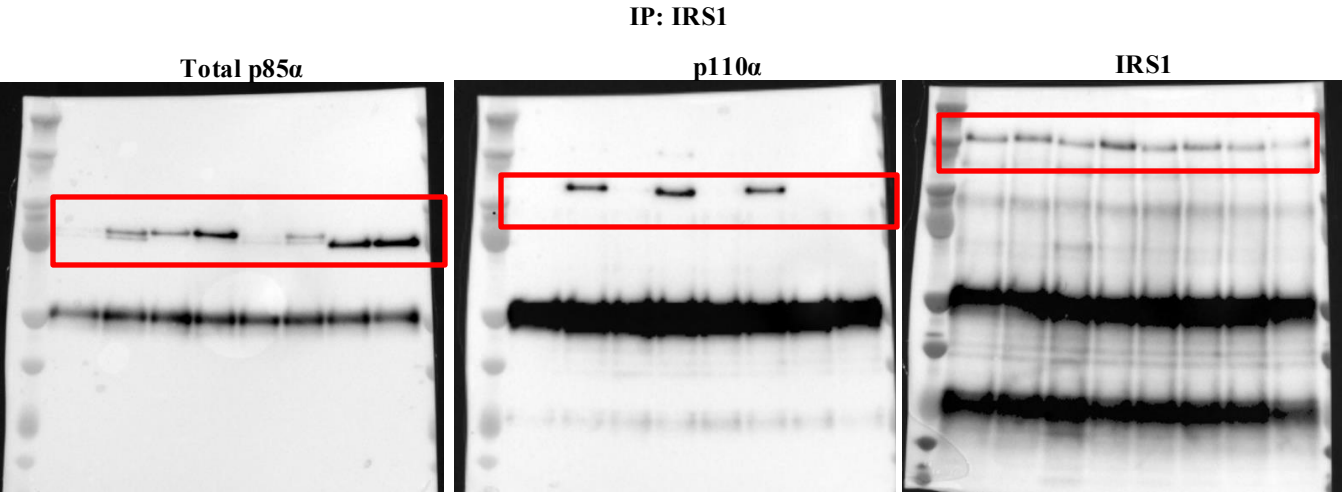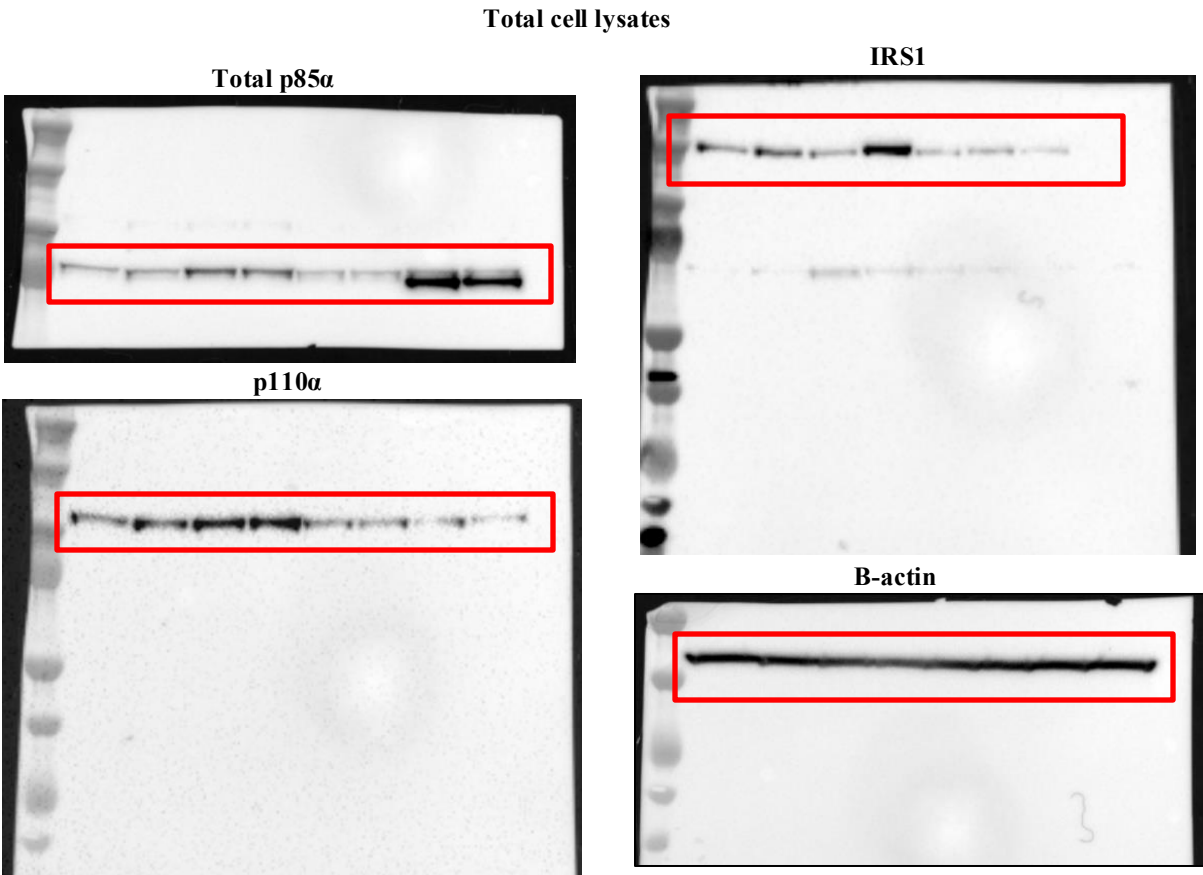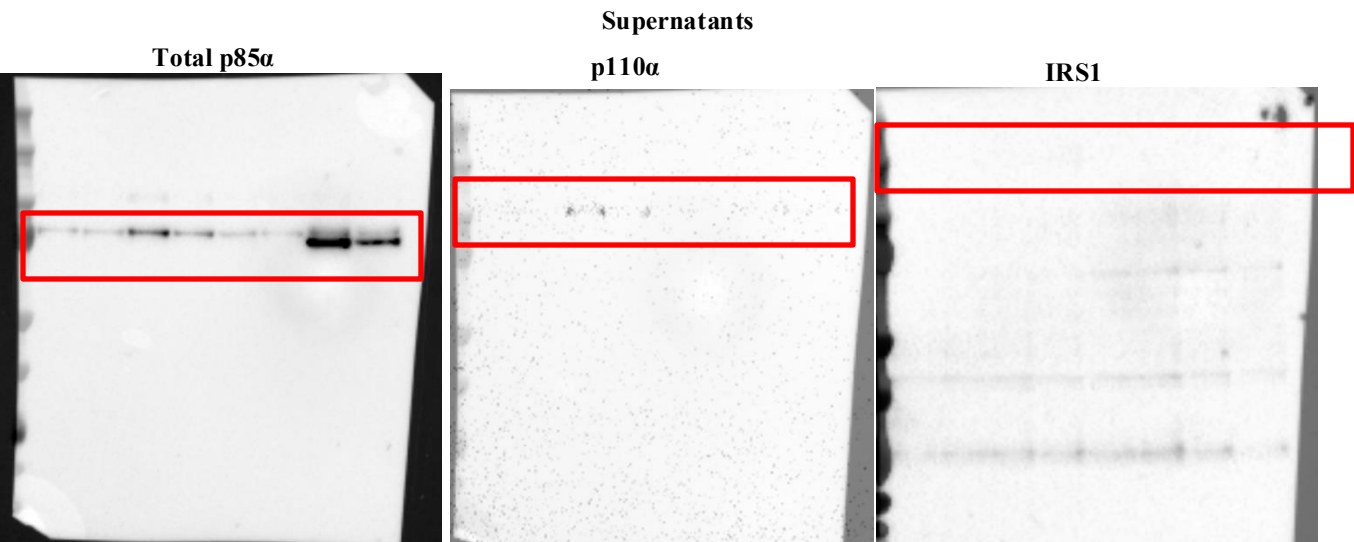

Supplement: fig5-data2 [file elife-94420-fig5-data2-v1.pdf]
