# Supplementary material for: Paradoxical dominant negative activity of an immunodeficiency-associated activating PIK3R1 variant
Source: eLife journal article supplement (doi:10.7554/elife.94420), 2024-02-20

Figure 6A – Images Shown

IP: IRS2

Total p85 $\alpha$

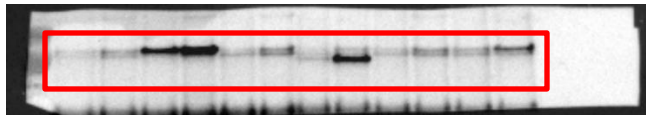

IRS2

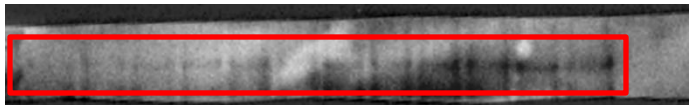

p110 $\alpha$

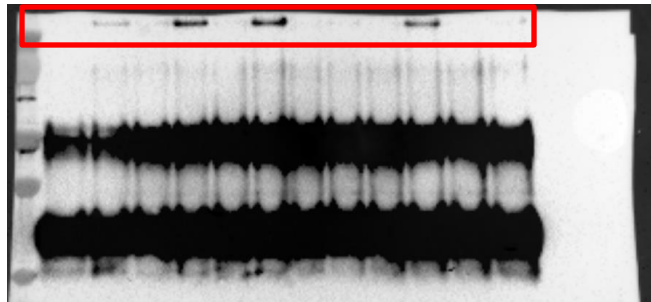

Total cell lysates

Total p85 $\alpha$

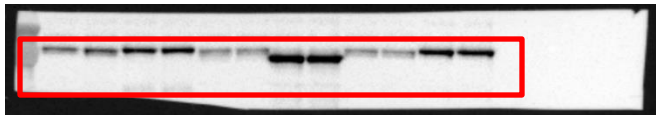

$\beta$ -actin

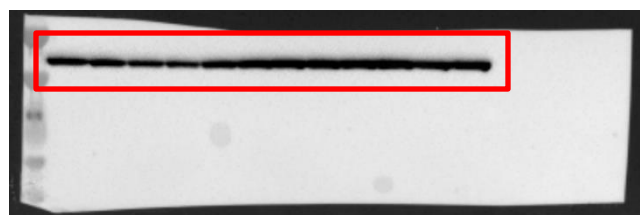

p110 $\alpha$

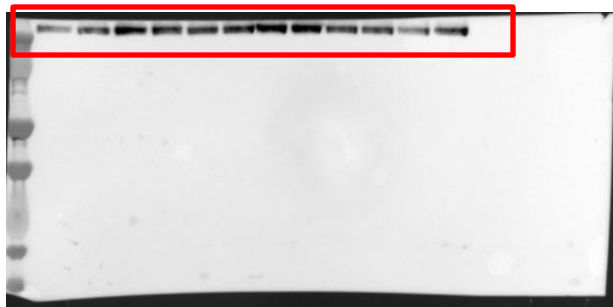

IRS2

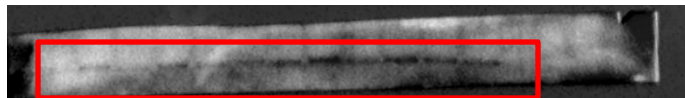

Supernatant

Total p85 $\alpha$

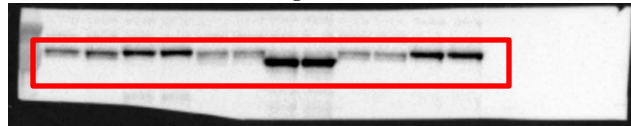

$\beta$ -actin

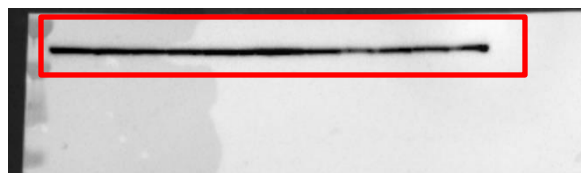

p110 $\alpha$

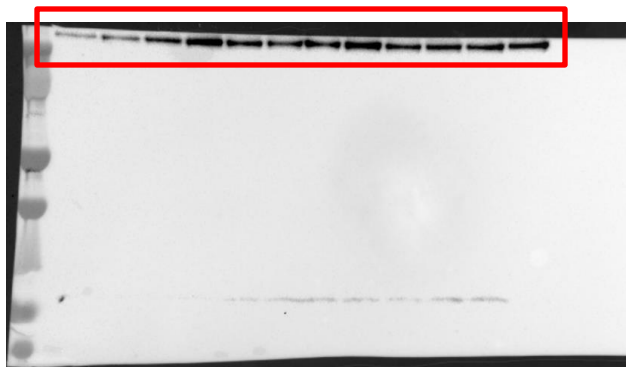

IRS2

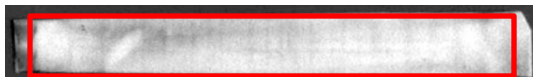

Figure 6A – Images Shown ctd

IP: IRS2

Total p85 $\alpha$

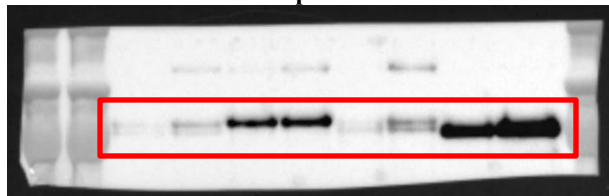

p110 $\alpha$

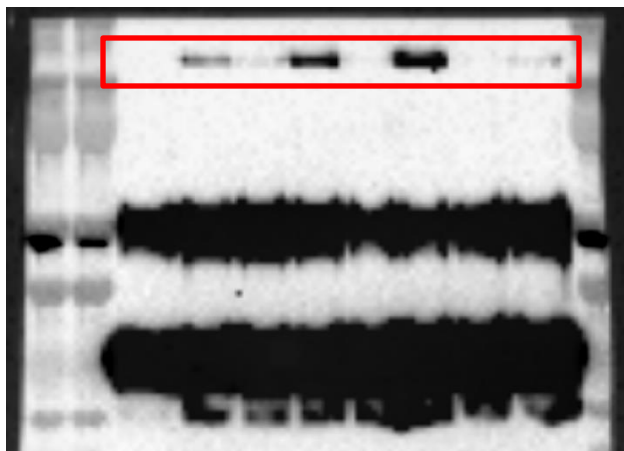

IRS2

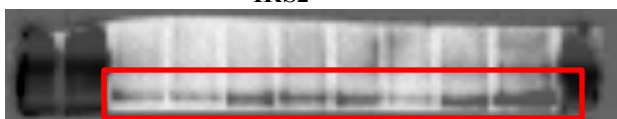

Total cell lysates

Supernatant

Total p85 $\alpha$

Total p85 $\alpha$

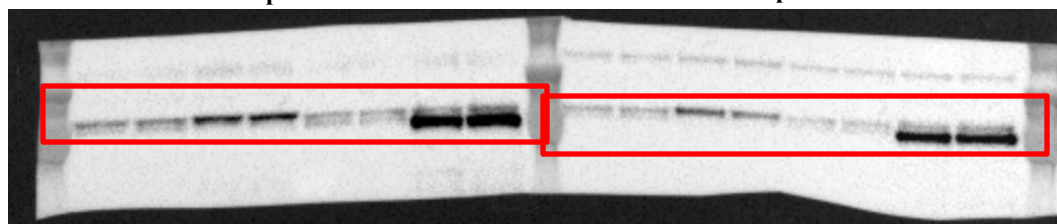

IRS2

IRS2

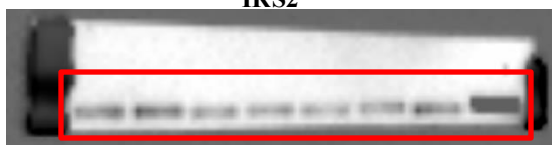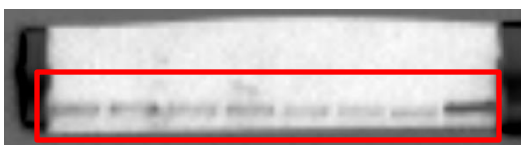

p110 $\alpha$

Total p110 $\alpha$

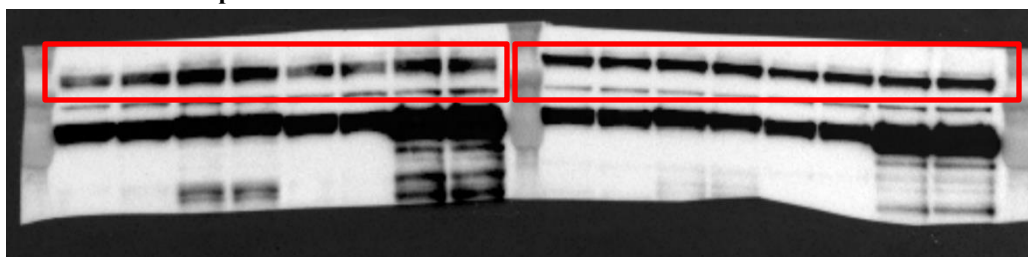

B-actin

B-actin

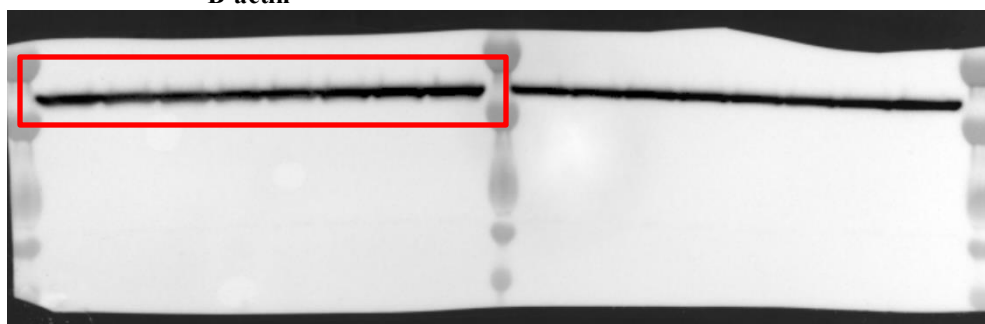

Figure 6A – Replicate 1

IP: IRS2

Total p85 $\alpha$

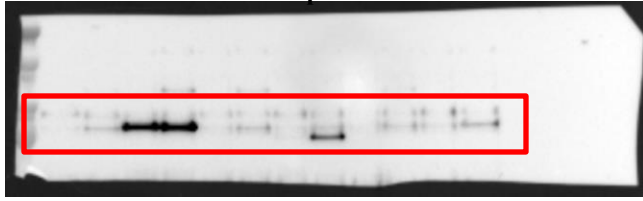

p110 $\alpha$

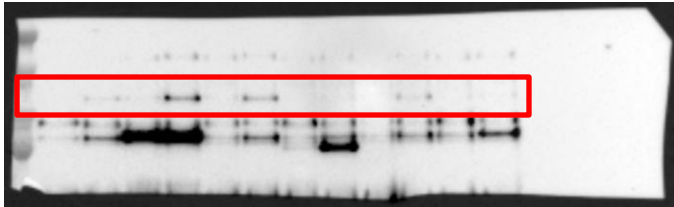

IRS2

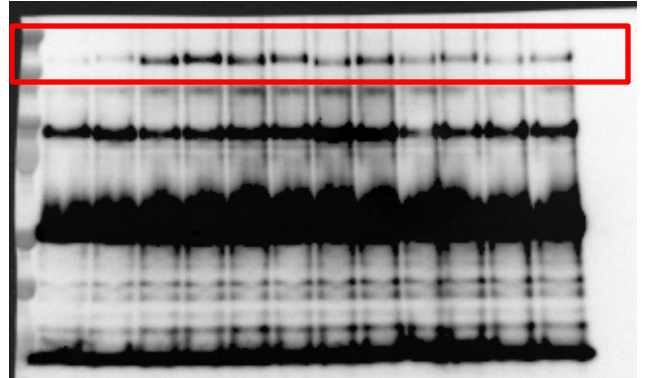

Total cell lysates

Total p85 $\alpha$

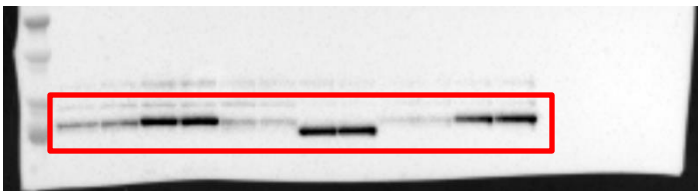

p110 $\alpha$

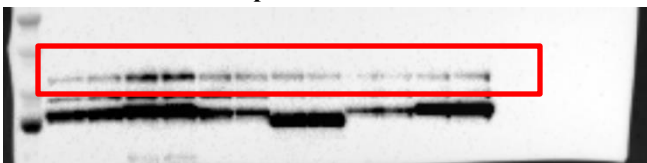

$\beta$ -actin

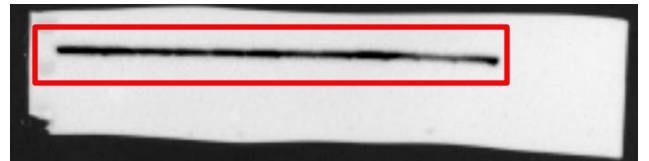

IRS2

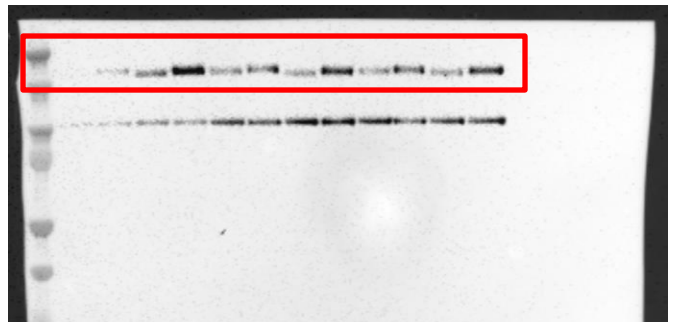

Supernatant

Total p85 $\alpha$

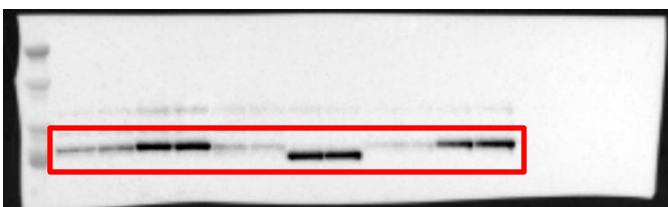

p110 $\alpha$

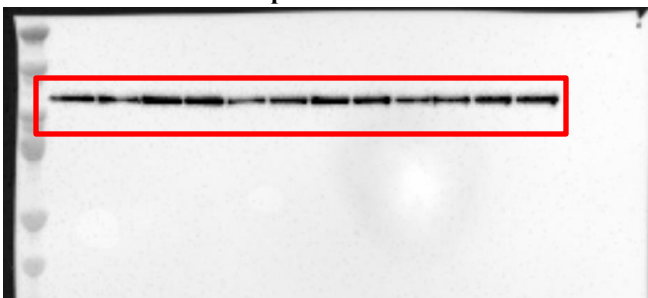

$\beta$ -actin

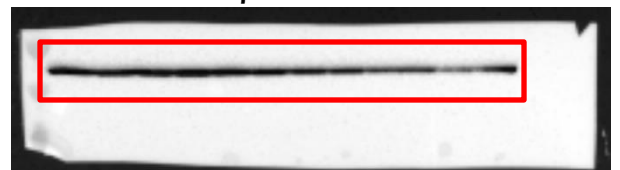

IRS2

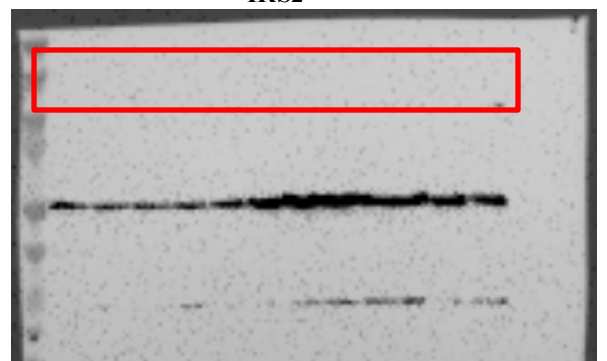

Figure 6A – Replicate 1 ctd

Total p85 $\alpha$

IP: IRS2

p110 $\alpha$

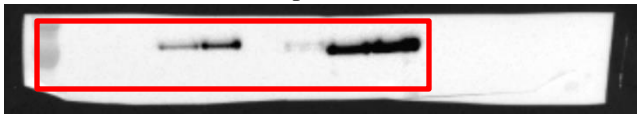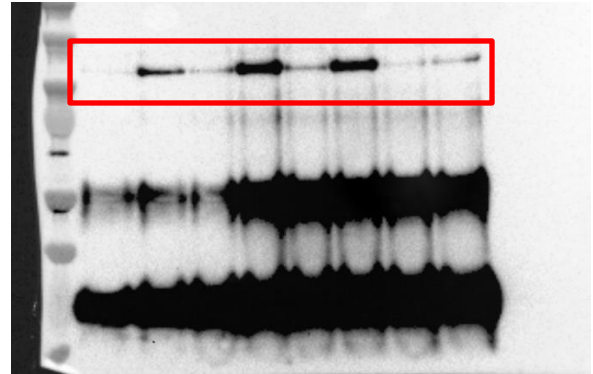

IRS2

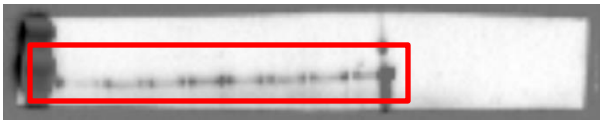

Total p85 $\alpha$

Total cell lysates

p110 $\alpha$

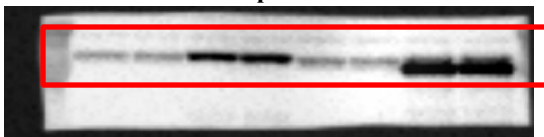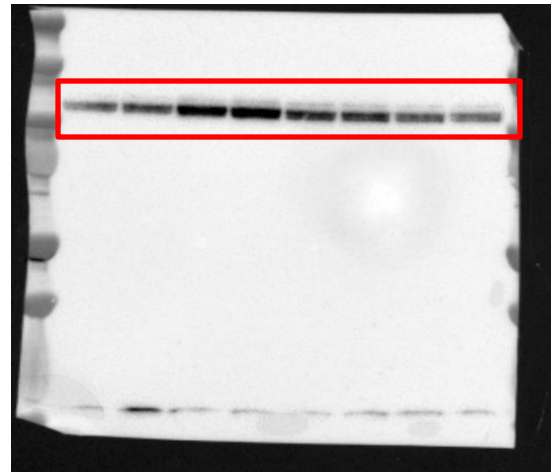

IRS2

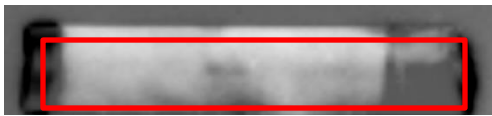

B-actin

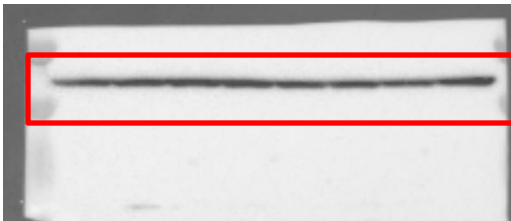

Total p85 $\alpha$

Supernatants

p110 $\alpha$

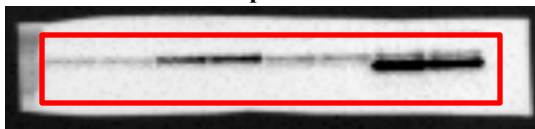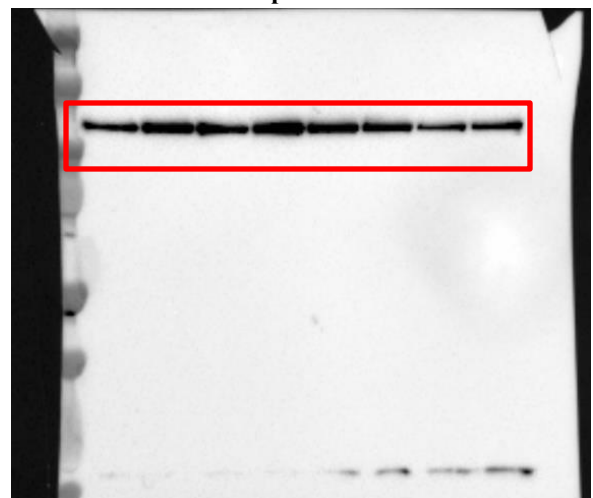

IRS2

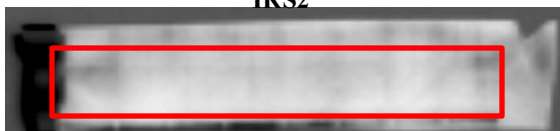

$\beta$ -actin

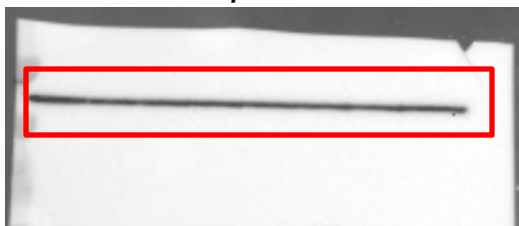

Figure 6A – Replicate 2

IP: IRS2

Total p85 $\alpha$

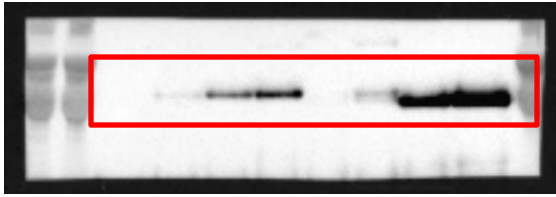

IRS2

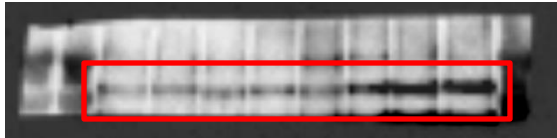

p110 $\alpha$

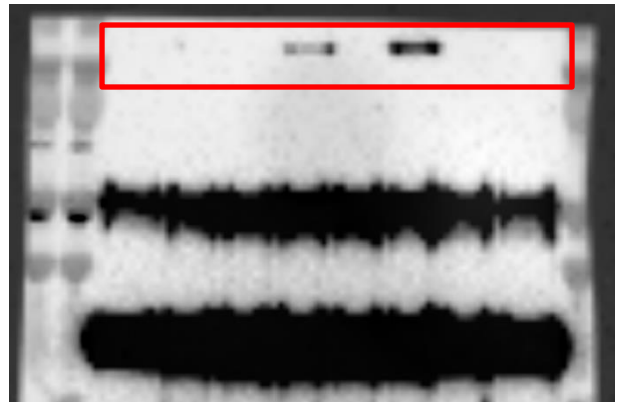

Total p85 $\alpha$

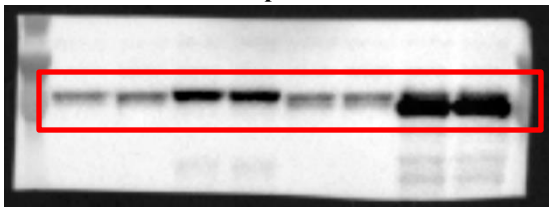

IRS2

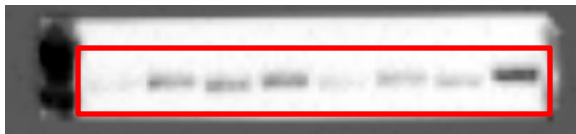

B-actin

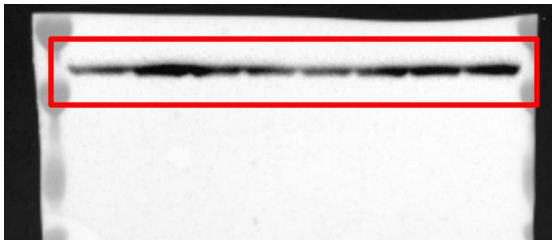

Total cell lysates

p110 $\alpha$

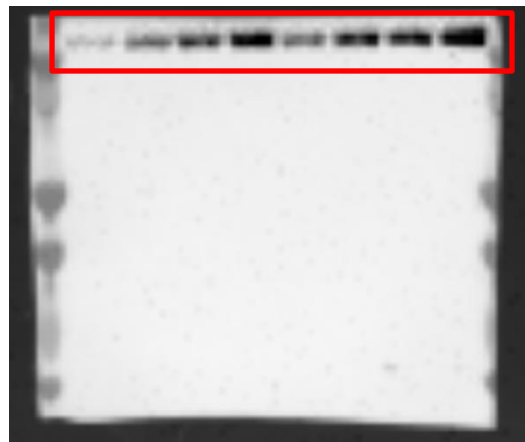

Total p85 $\alpha$

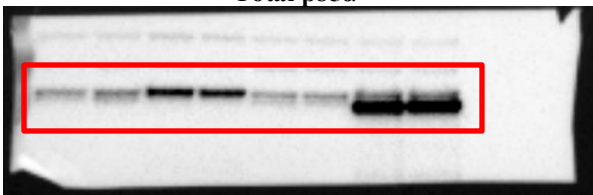

IRS2

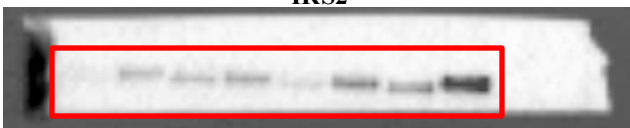

Supernatants

p110 $\alpha$

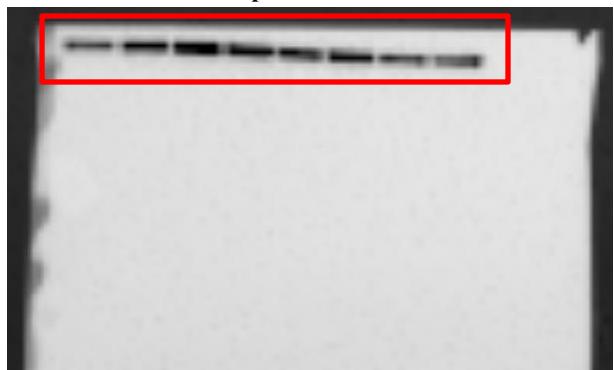

$\beta$ -actin

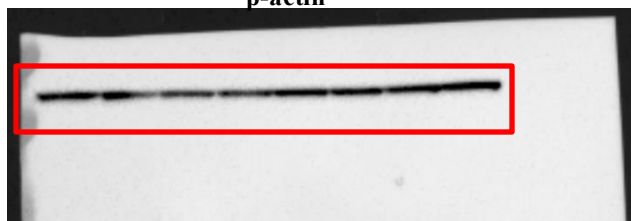

Supplement: fig6-data2 [file elife-94420-fig6-data2-v1.pdf]
