# Supplementary material for: Paradoxical dominant negative activity of an immunodeficiency-associated activating PIK3R1 variant
Source: eLife journal article supplement (doi:10.7554/elife.94420), 2024-02-20

Figure 2A – Images shown

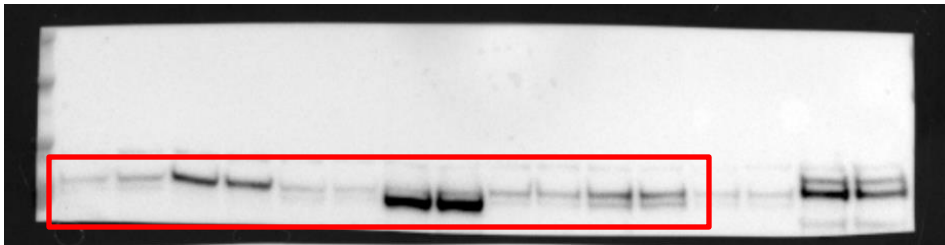

**Total p85α**

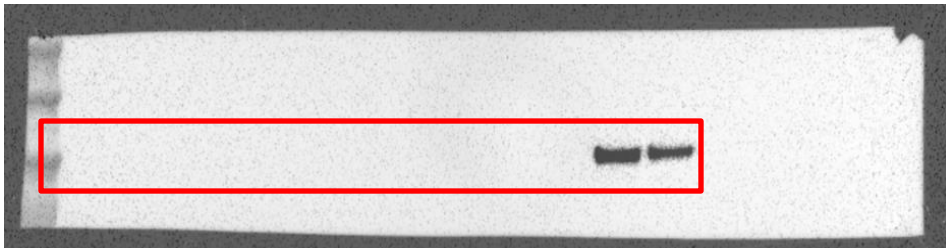

**p110α**

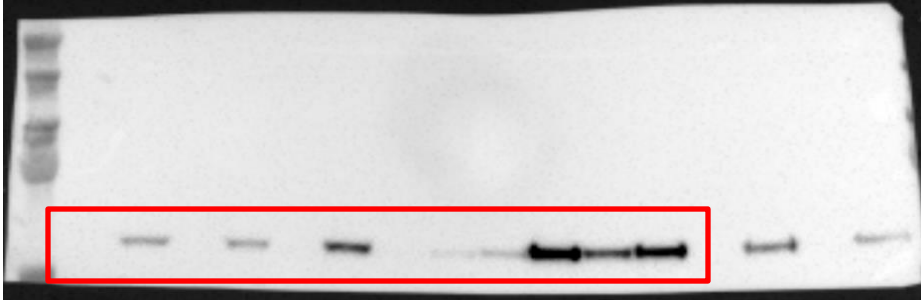

**pAkt (Ser473)**

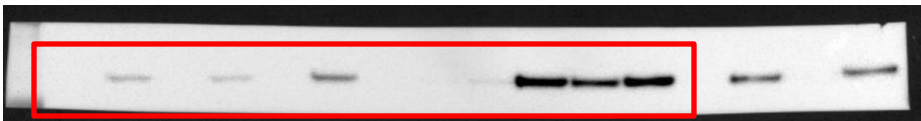

**pAkt (Thr308)**

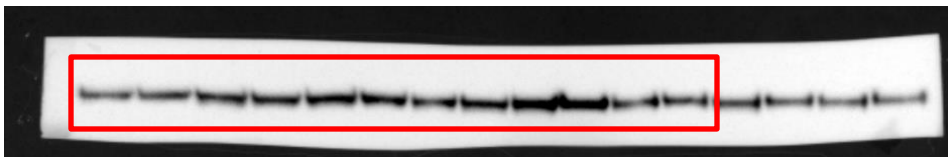

**Total Akt**

Figure 2A – Replicate 1

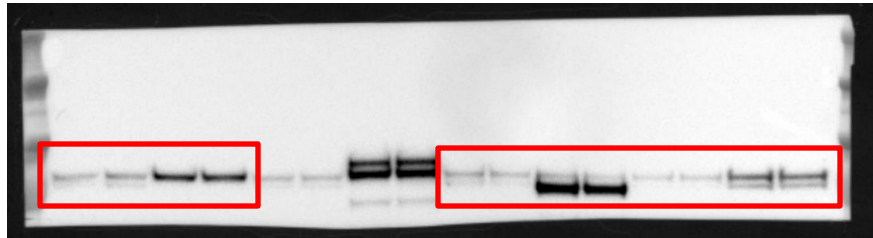

Total p85α

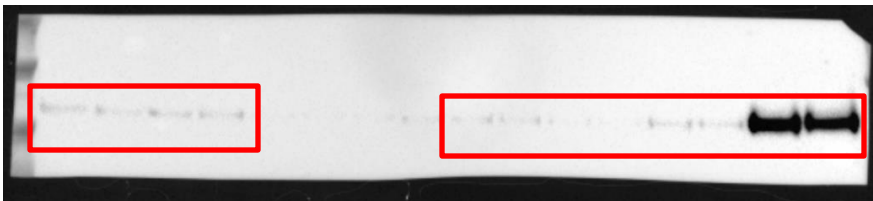

p110α

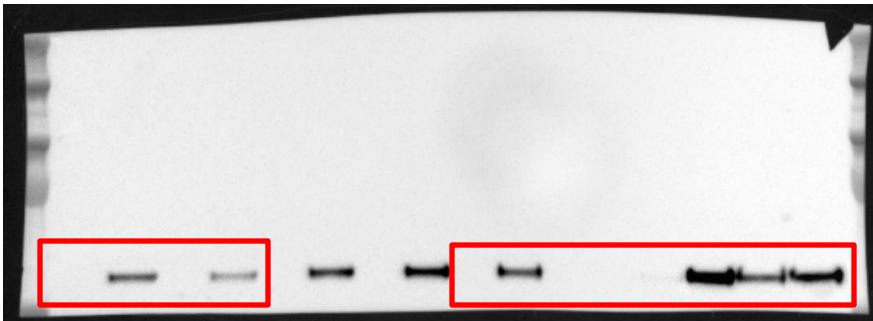

pAkt (Ser473)

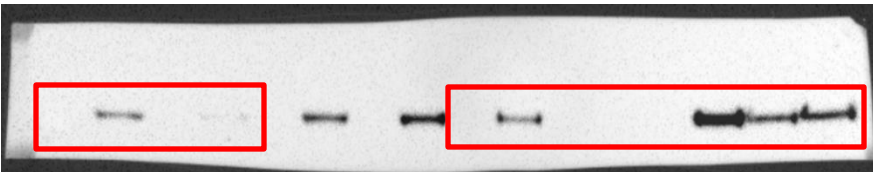

pAkt (Thr308)

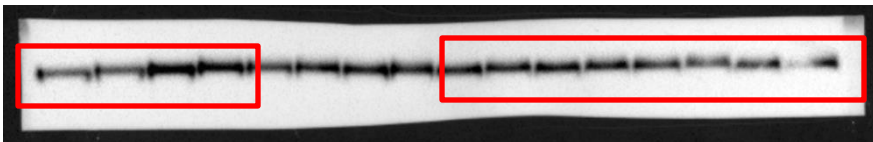

Total Akt

Figure 2A – Replicate 2

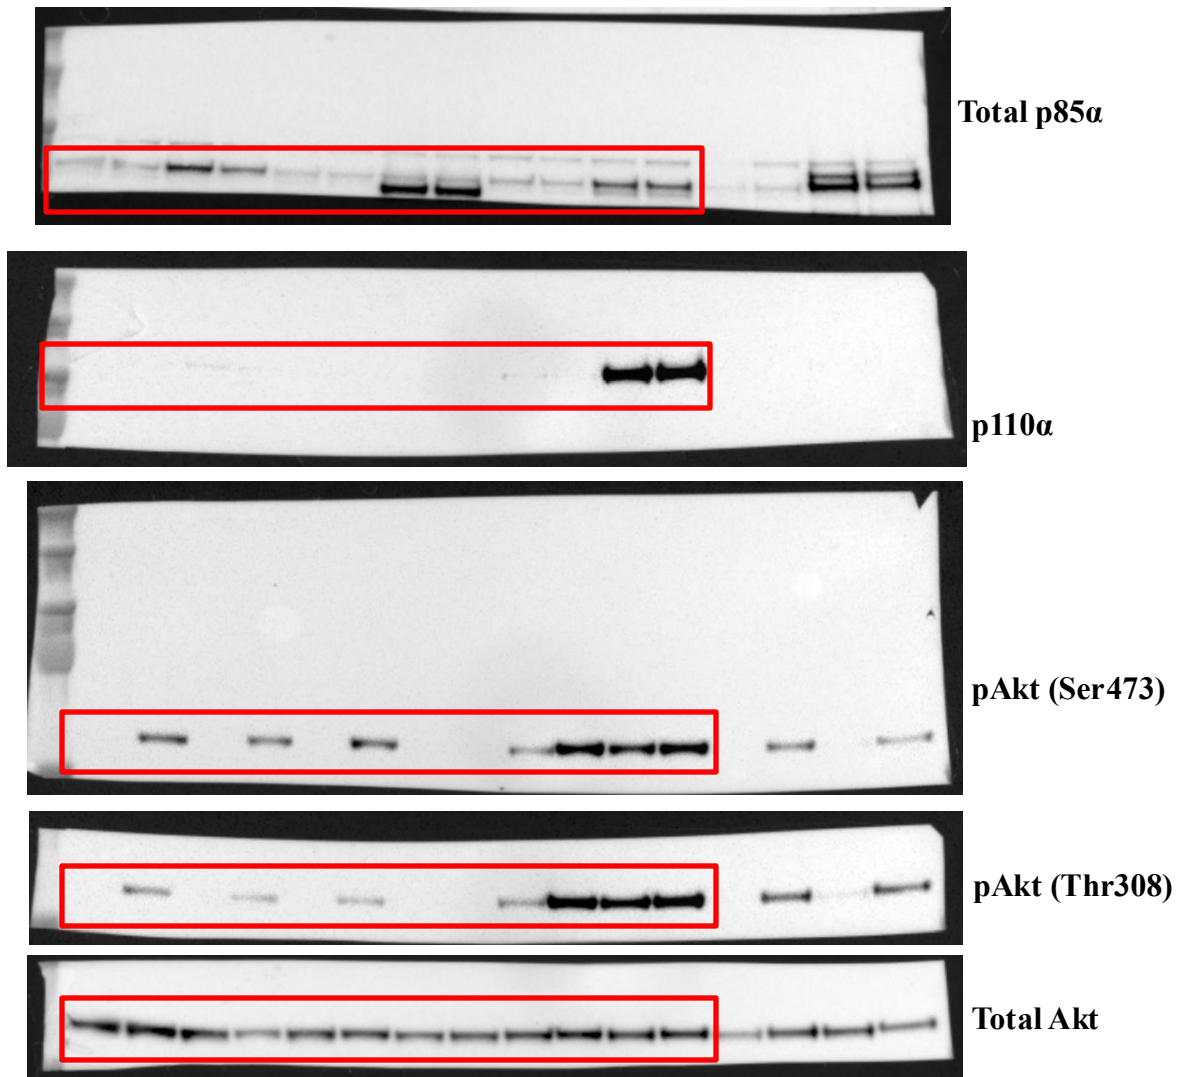

Supplement: fig2-data2 [file elife-94420-fig2-data2-v1.pdf]
