# Supplementary material for: Paradoxical dominant negative activity of an immunodeficiency-associated activating PIK3R1 variant
Source: eLife journal article supplement (doi:10.7554/elife.94420), 2024-02-20

Figure 2D – Images shown

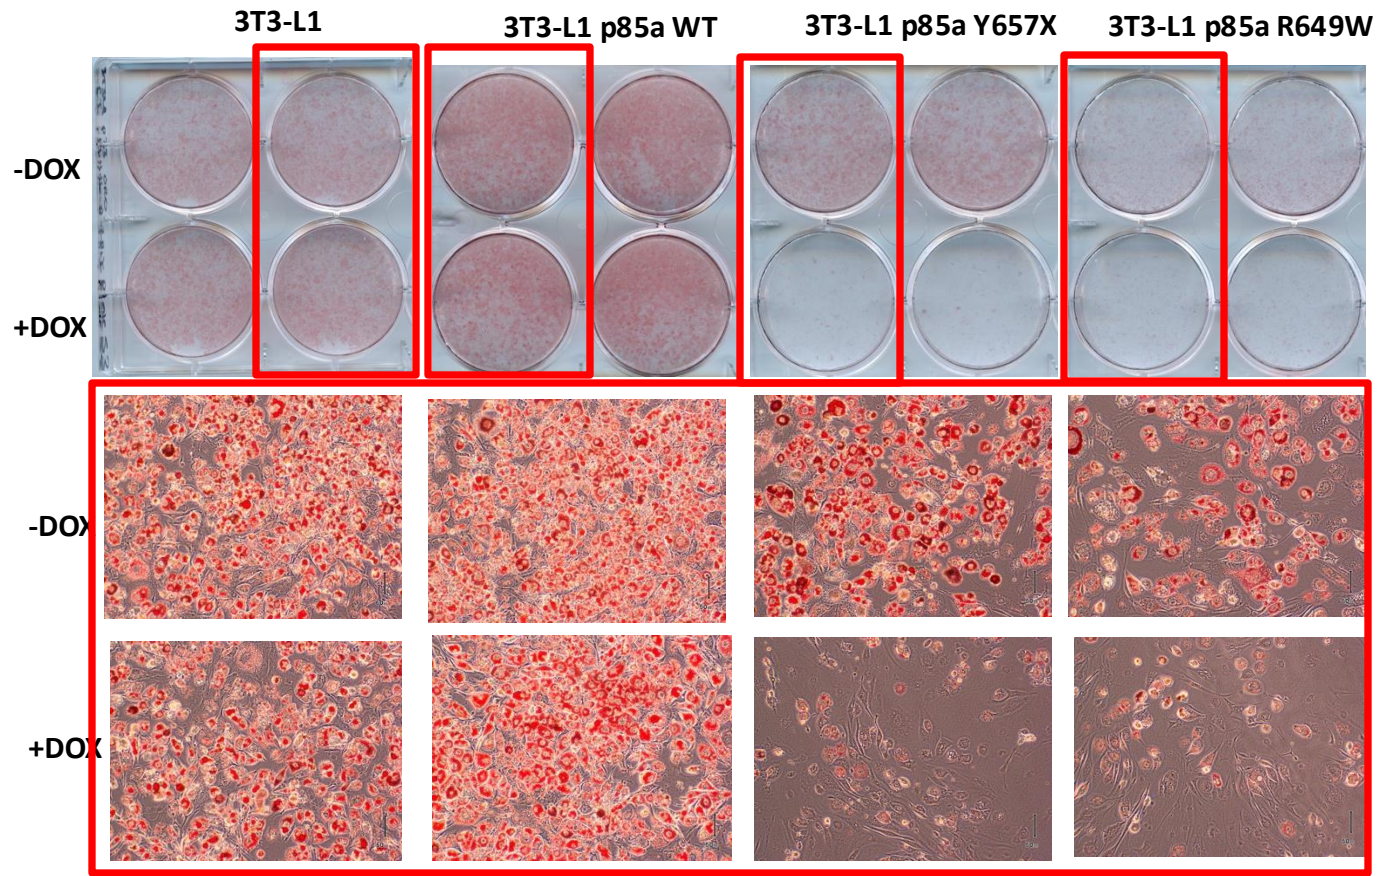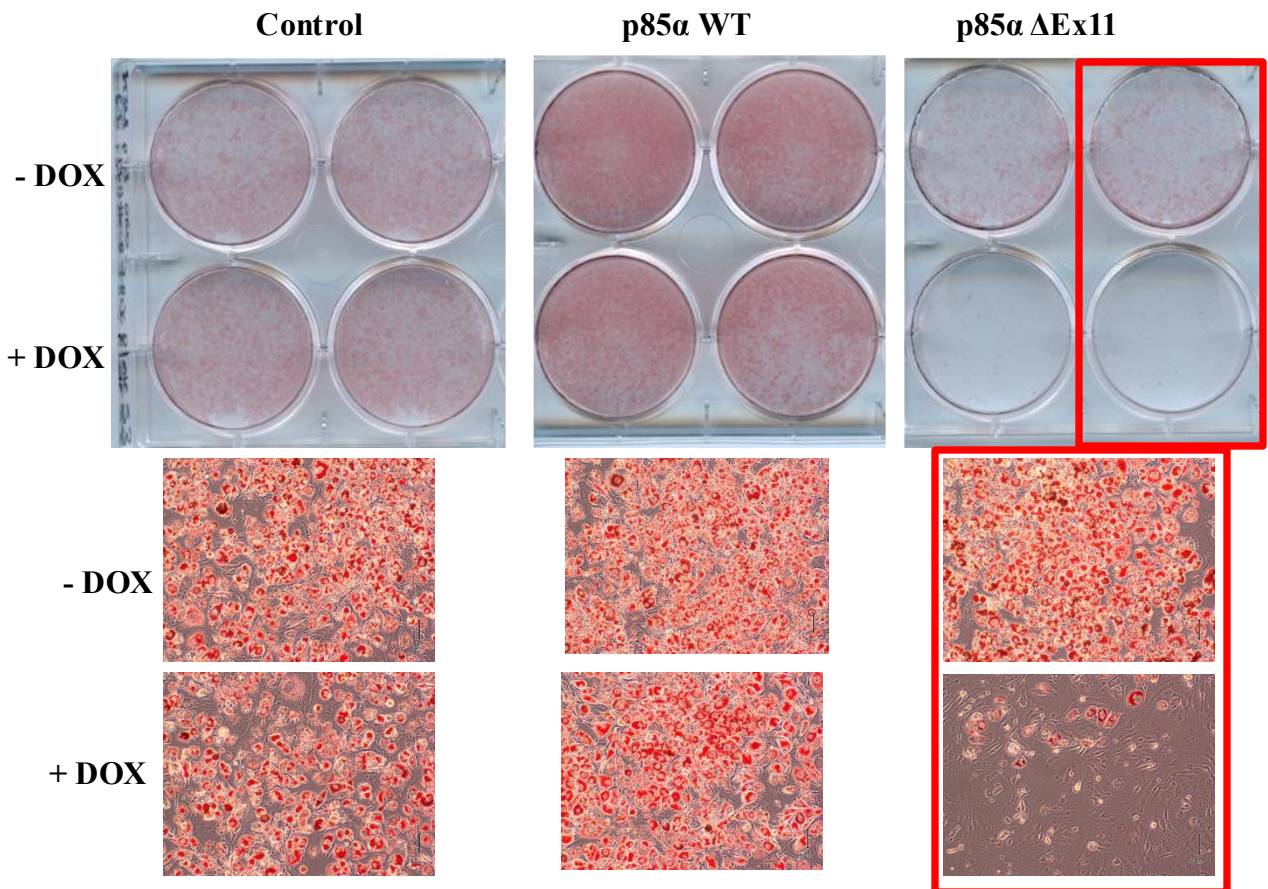



Figure 2D – Replicate 1

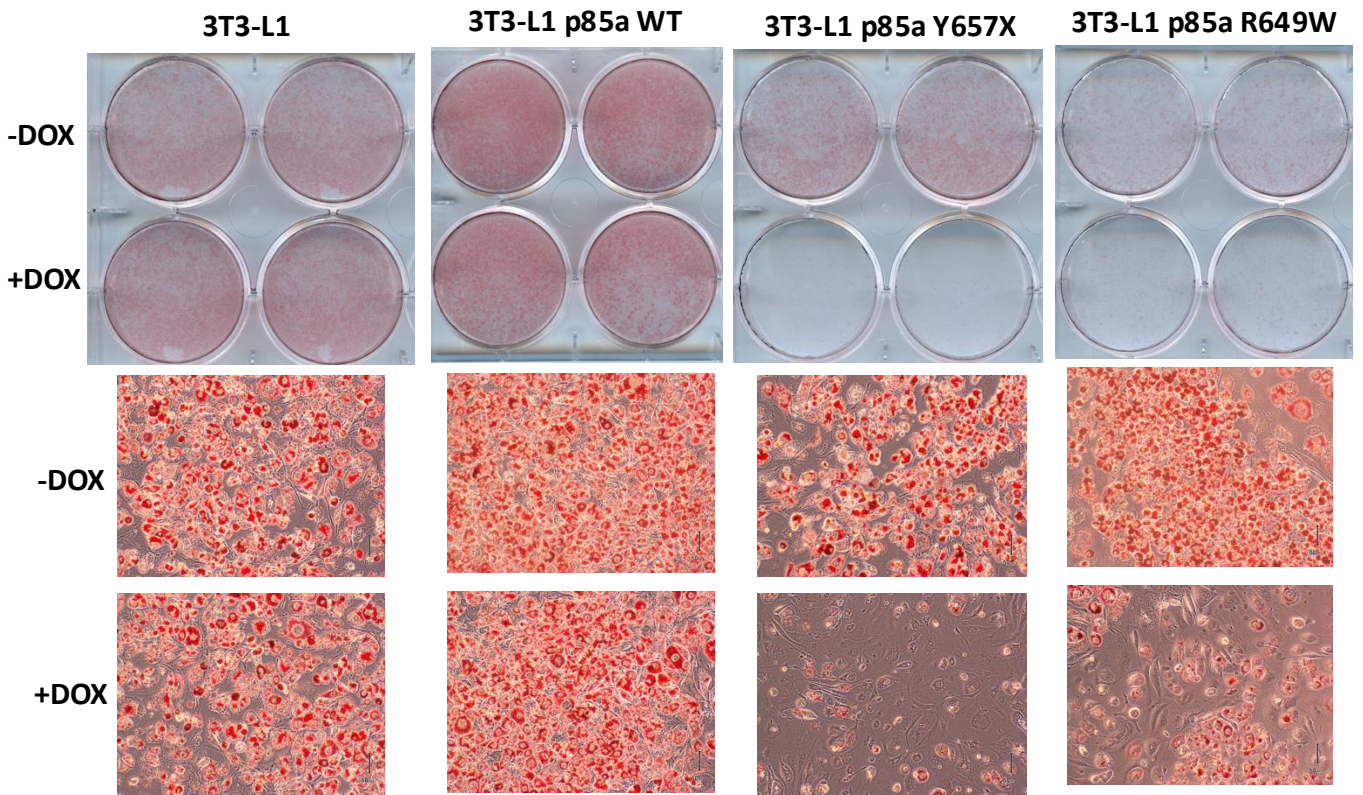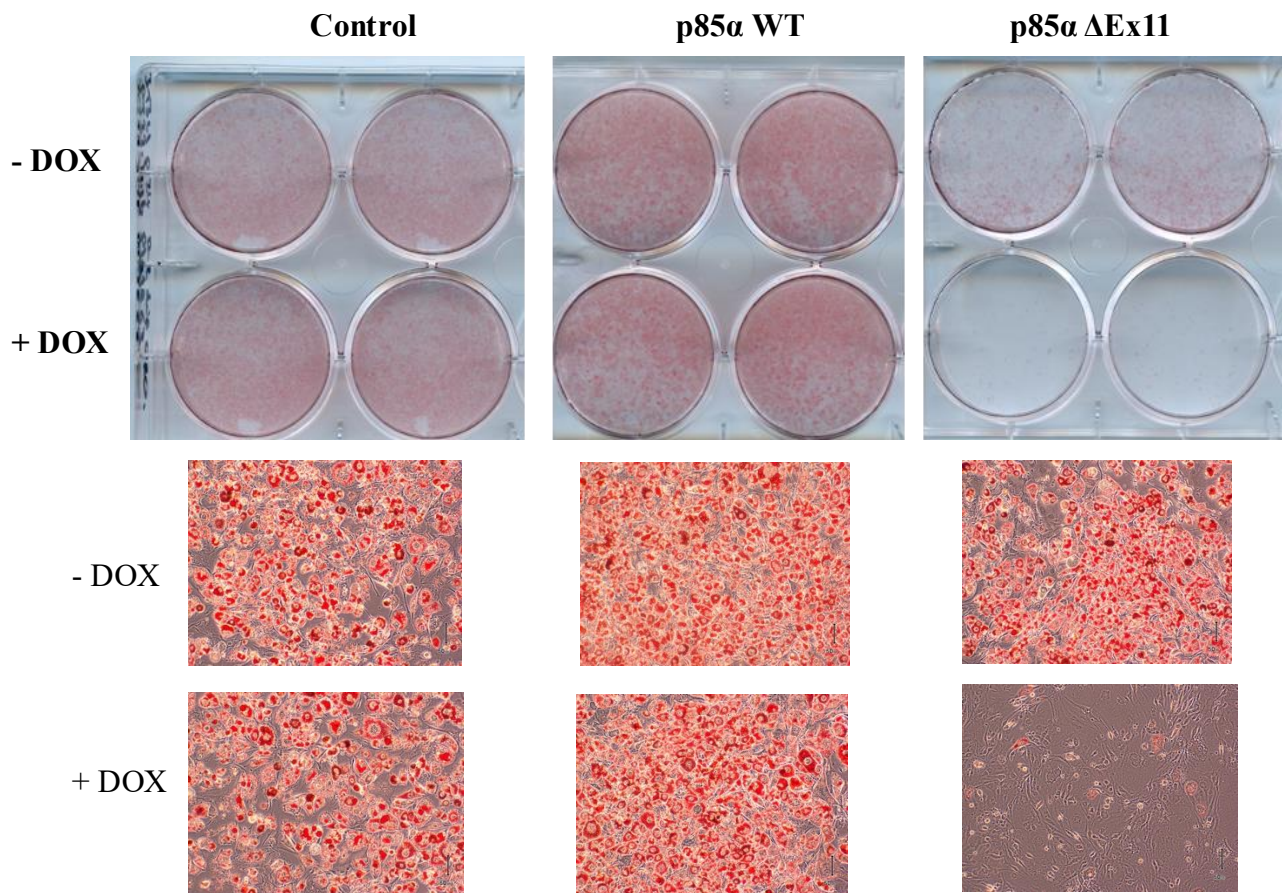



Figure 2D – Replicate 2

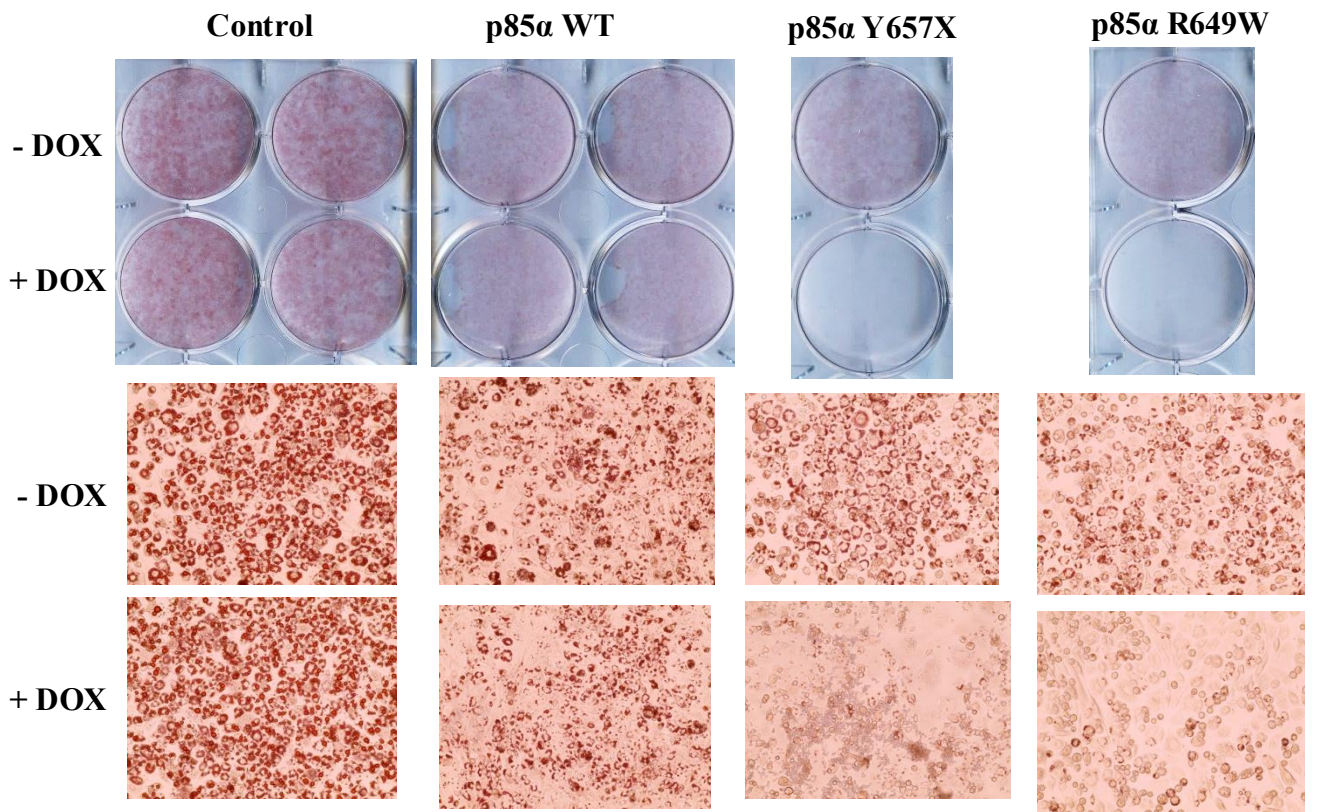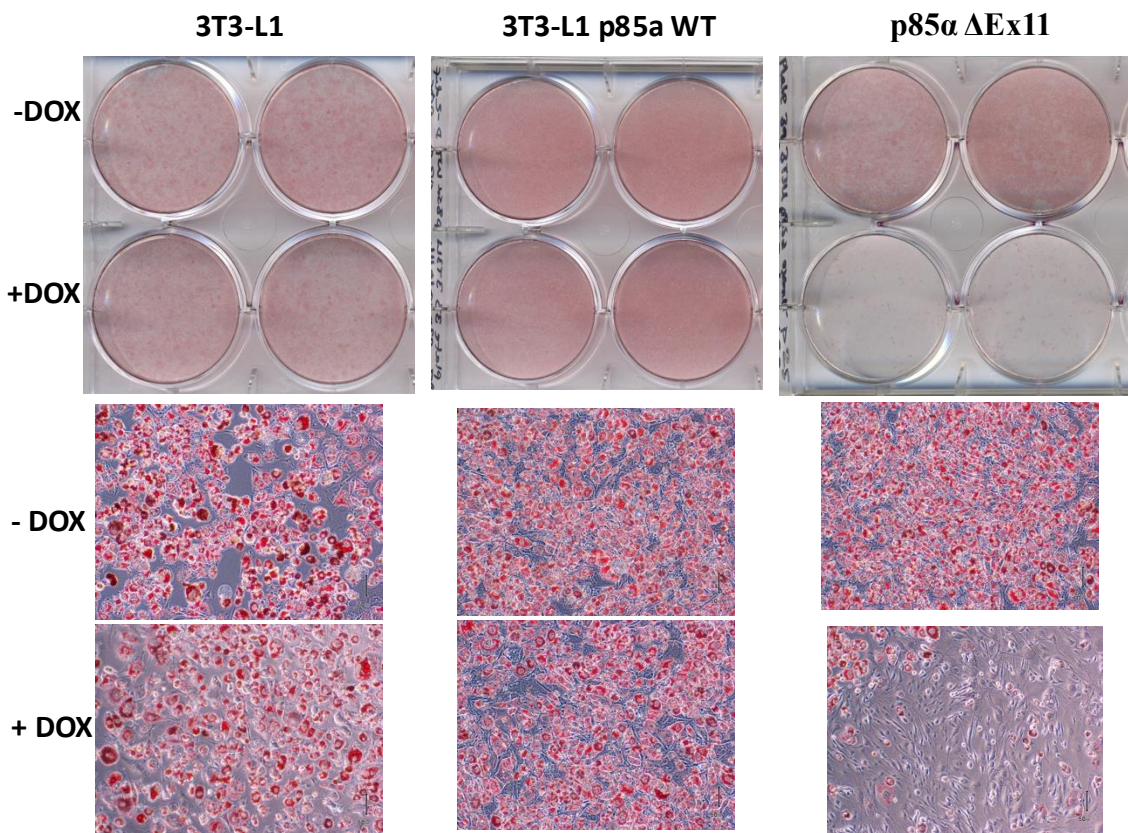

Supplement: fig2-data3 [file elife-94420-fig2-data3-v1.pdf]
