# Supplementary material for: Paradoxical dominant negative activity of an immunodeficiency-associated activating PIK3R1 variant
Source: eLife journal article supplement (doi:10.7554/elife.94420), 2024-02-20

**Figure 2-figure supplement 3 – Images shown**  
(Doxycycline dose response: 0, 0.02, 0.03, 0.045, 0.065, 0.1  $\mu$ g/mL)

**Control**  
**Total p85 $\alpha$**

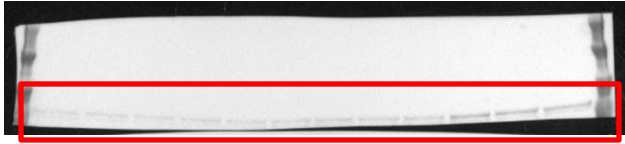

**pAkt (Ser473)**

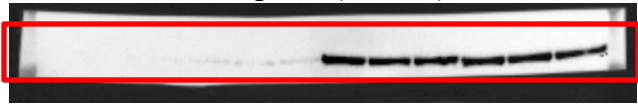

**p85 $\alpha$   $\Delta$ Ex11**  
**Total p85 $\alpha$**

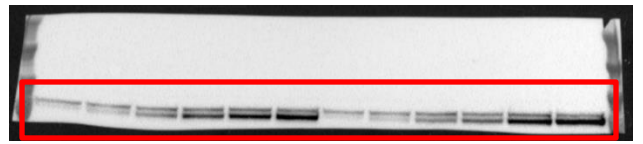

**pAkt (Ser473)**

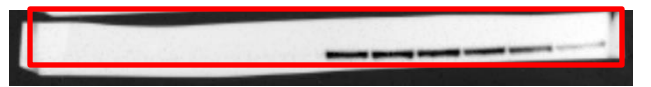

**Total Akt**

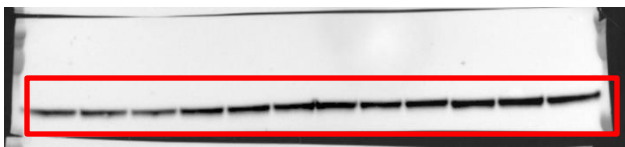

**Total Akt**

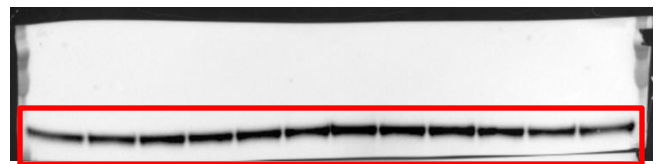

**p85 $\alpha$  WT**  
**Total p85 $\alpha$**

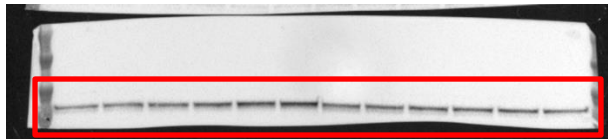

**pAkt (Ser473)**

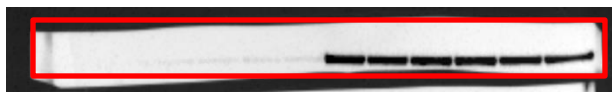

**Total Akt**

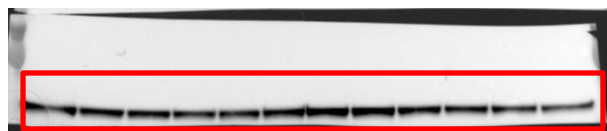

**Figure 2-figure supplement 3 – Replicate but with wider doxycycline dose range (0,0.0001,0.001,0.01,0.1,1 ug/mL)**

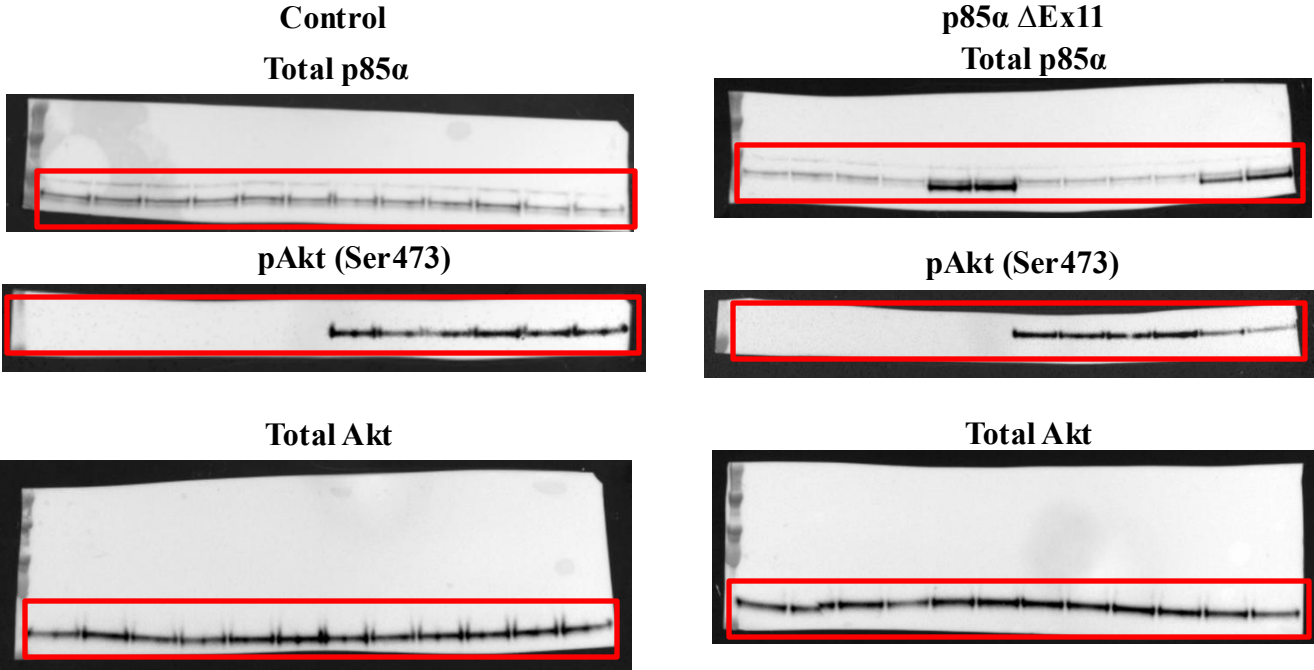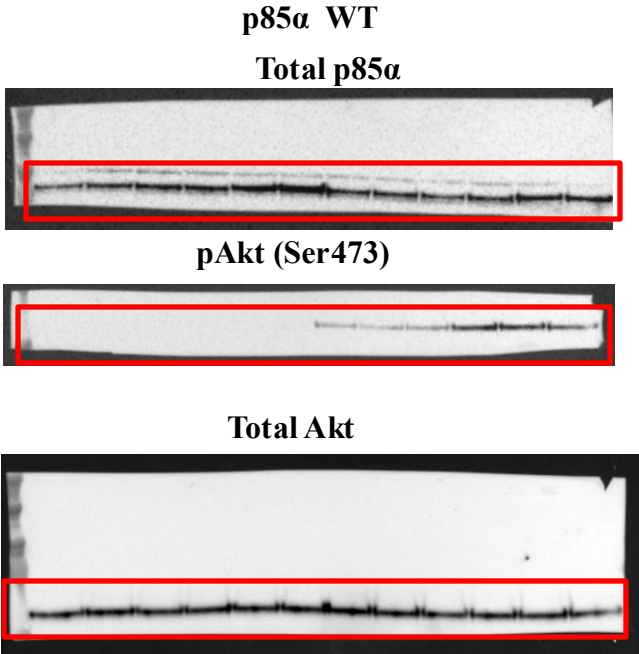

Supplement: fig2-figsupp3-data2 [file elife-94420-fig2-figsupp3-data2-v1.pdf]
