# Supplementary material for: Paradoxical dominant negative activity of an immunodeficiency-associated activating PIK3R1 variant
Source: eLife journal article supplement (doi:10.7554/elife.94420), 2024-02-20

Figure 4 – Images Shown

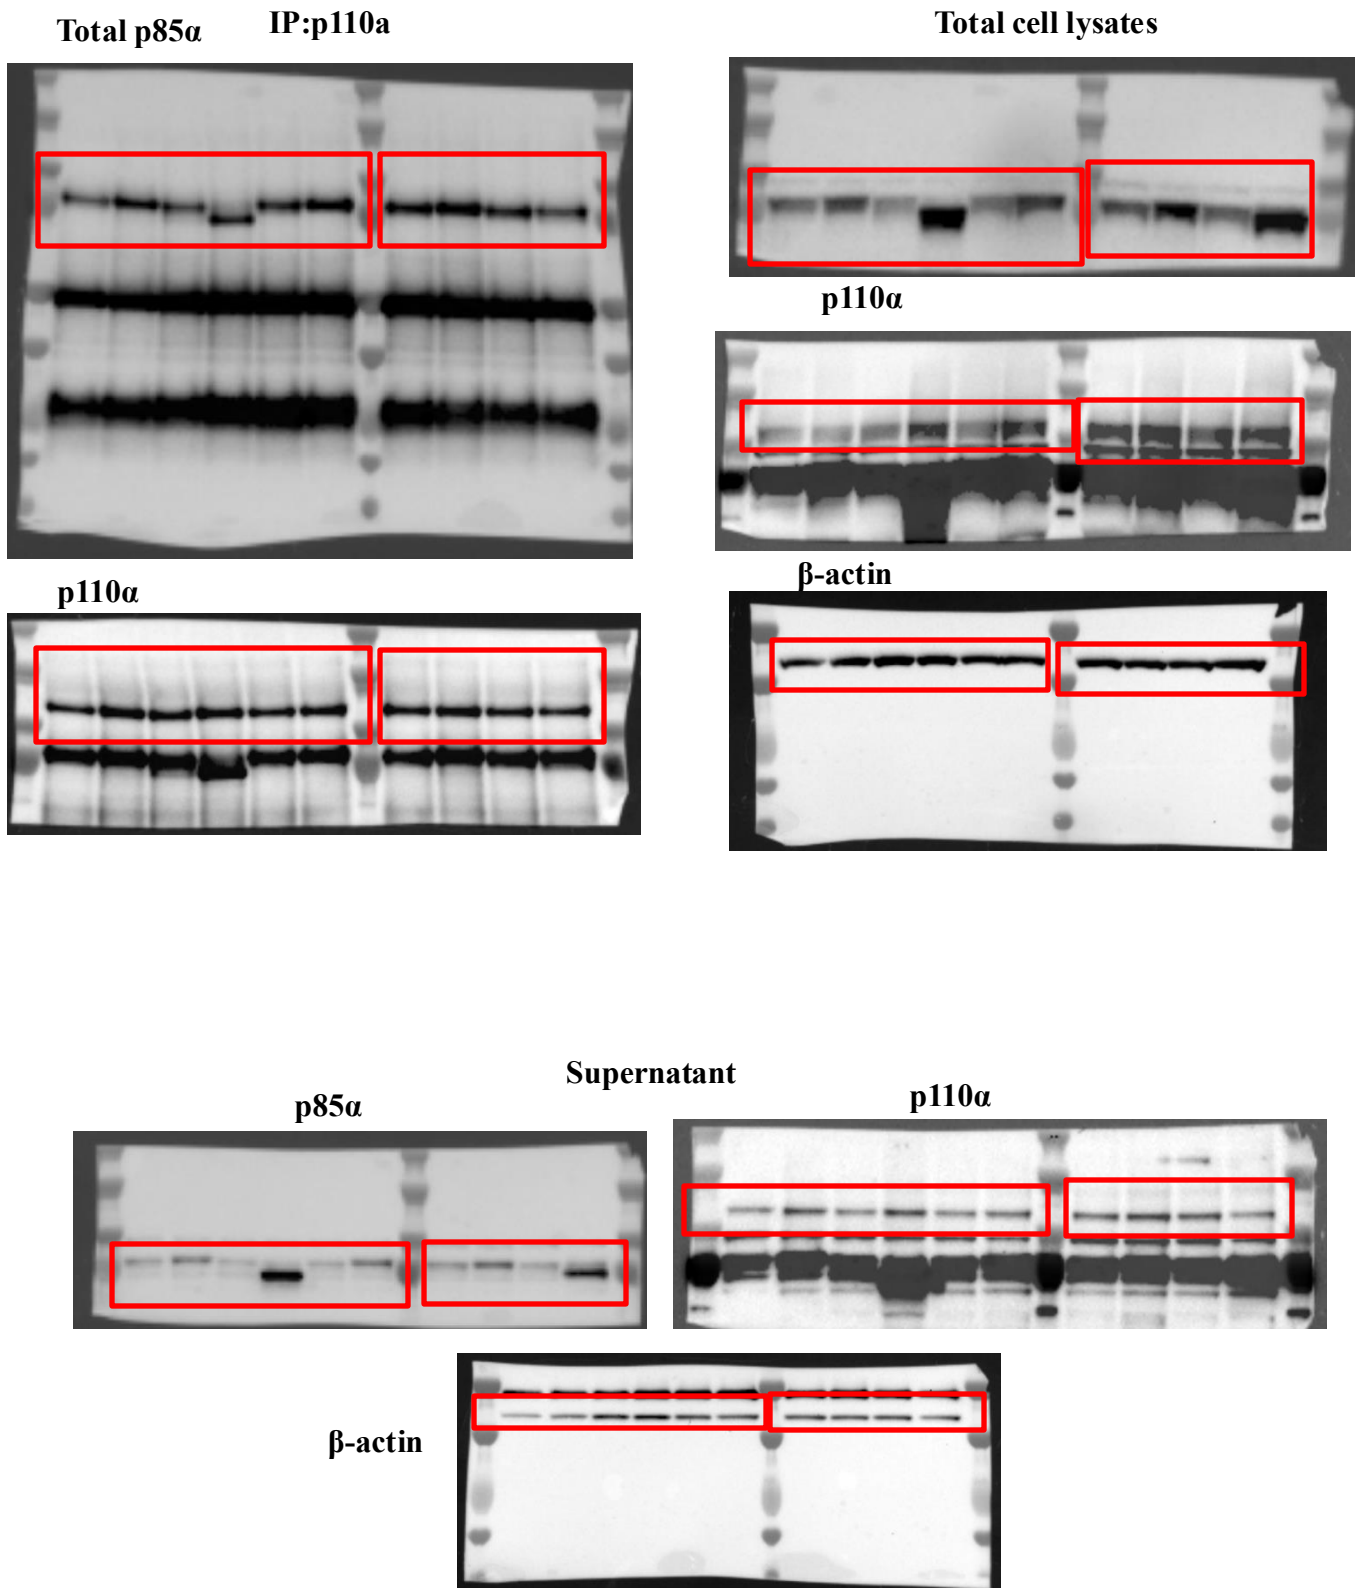

Figure 4 – Replicate 1

IP: p110 $\alpha$

p85 $\alpha$

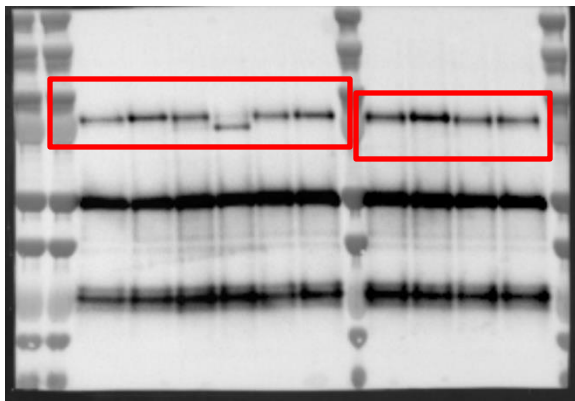

p110 $\alpha$

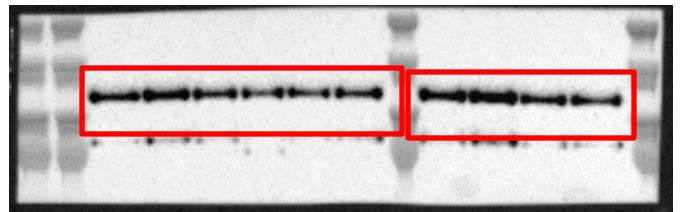

Total cell lysates

p85 $\alpha$

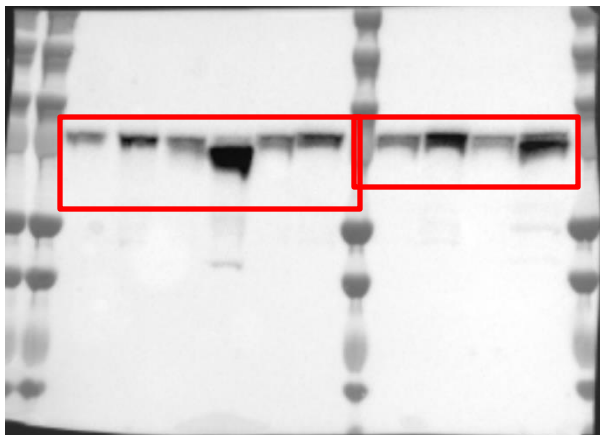

p110 $\alpha$

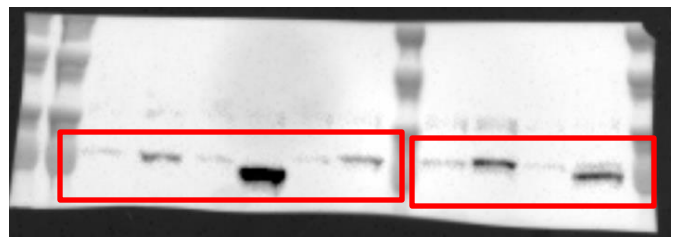

$\beta$ -actin

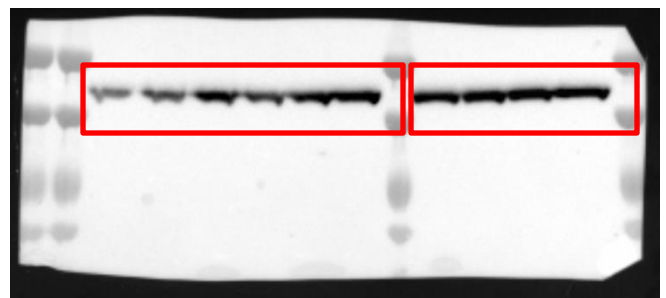

Supernatant

p85 $\alpha$

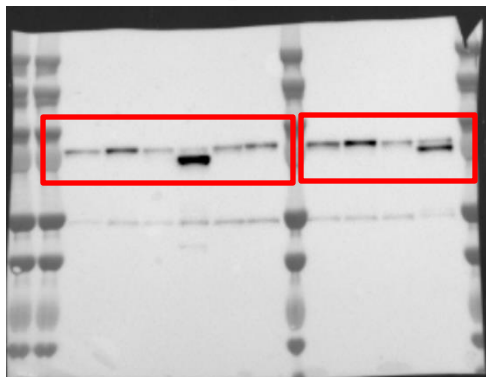

p110 $\alpha$

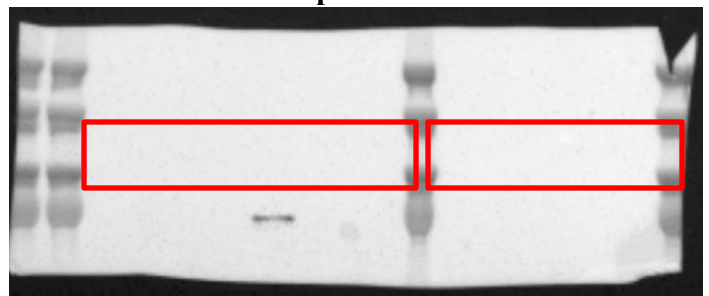

$\beta$ -actin

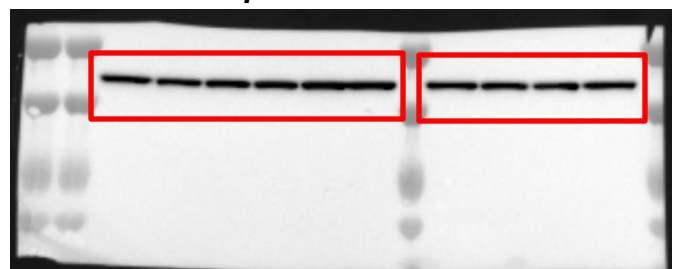

Figure 4 – Replicate 2

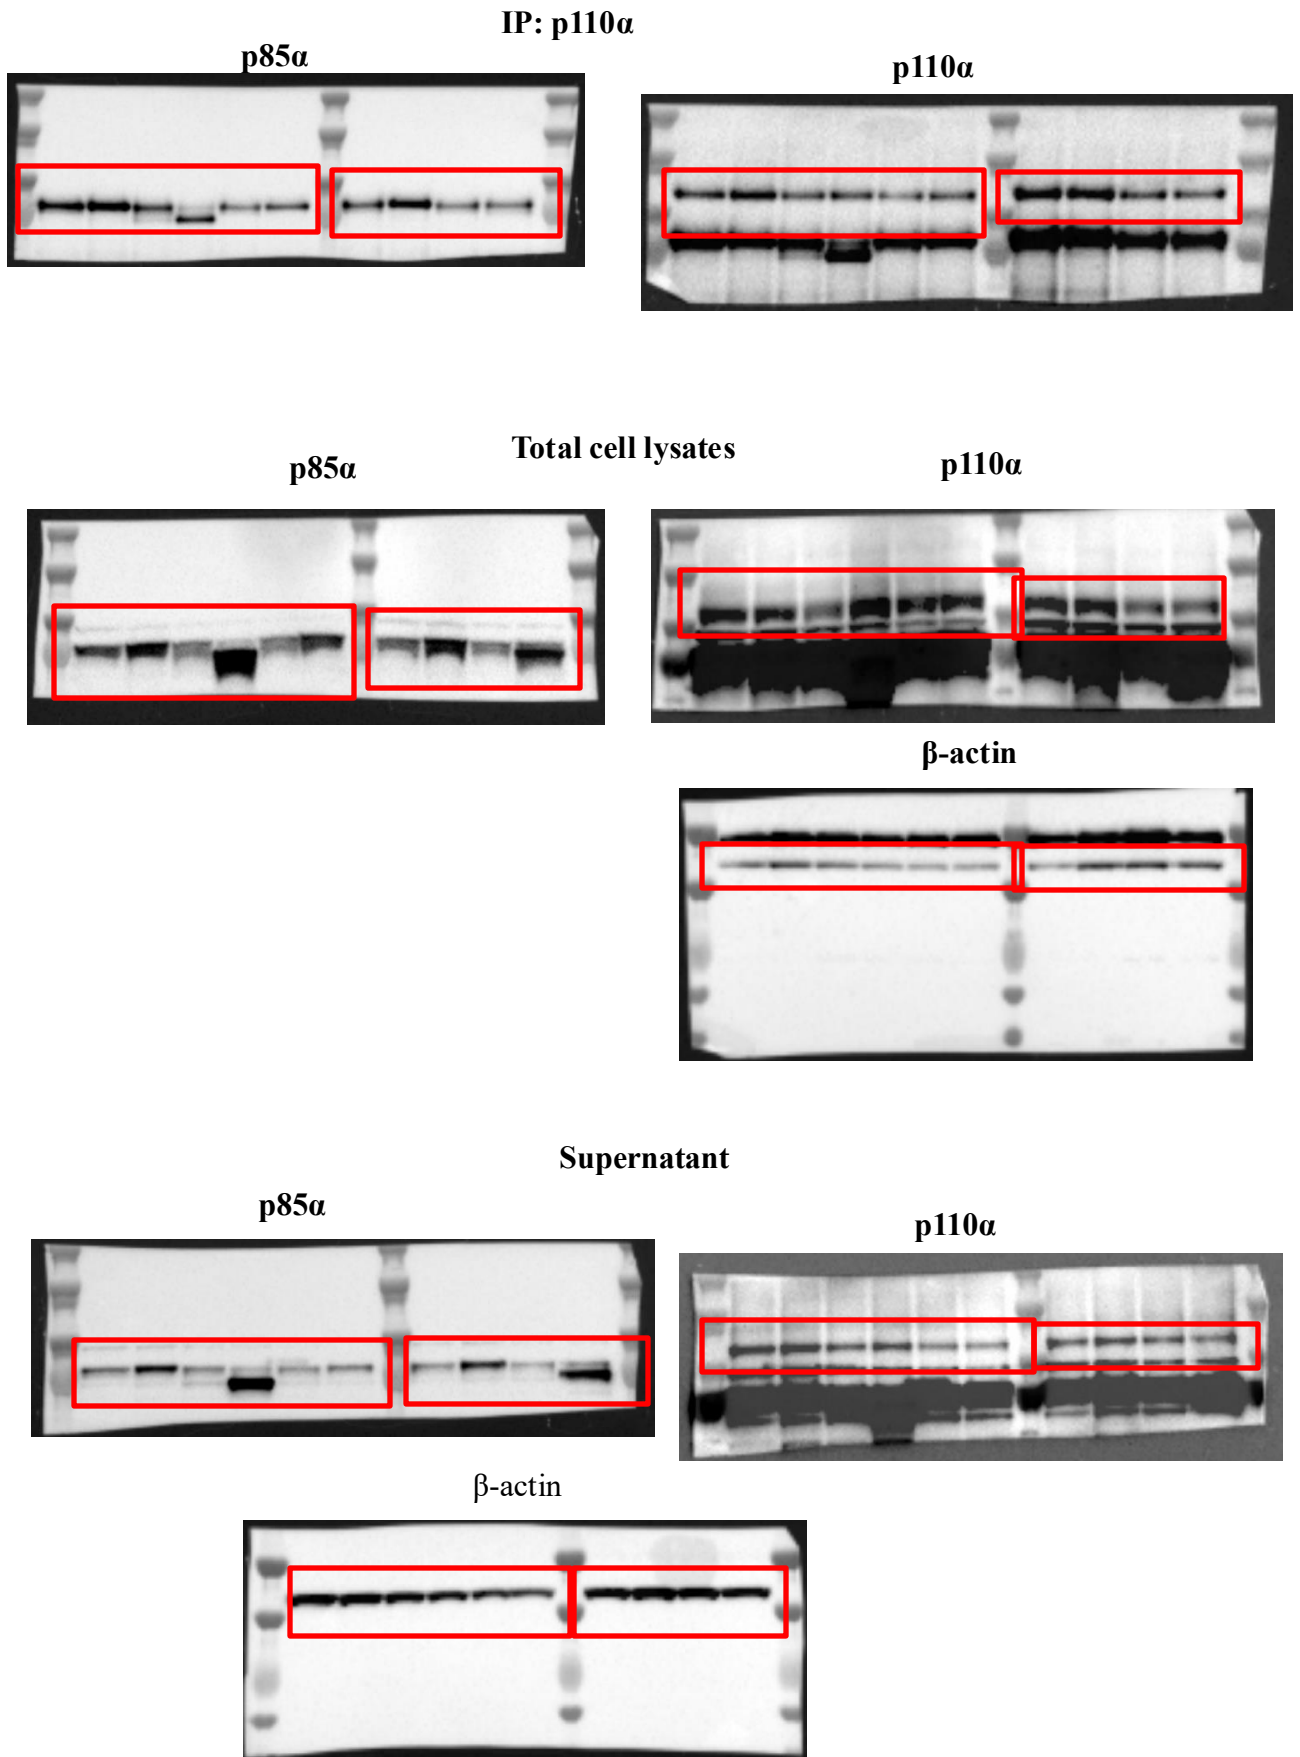

Supplement: fig4-data2 [file elife-94420-fig4-data2-v1.pdf]
